# Supplementary material
Source: publisher figshare collection journal article supplement (https://acs.figshare.com/ndownloader/files/4575172)

# Intermolecular Non-Reductive Alkylation of Enamides via Radical–Polar Crossover

Gregory K. Friestad\* and Yaoping Wu

*Department of Chemistry, University of Iowa, Iowa City, Iowa, 52242*

*gregory-friestad@uiowa.edu*

## Supporting Information

### Contents:

|                                                                                        |    |
|----------------------------------------------------------------------------------------|----|
| Materials and Methods                                                                  | S1 |
| Preparation and Characterization Data for Compounds <b>2</b> and <b>3a–3o</b>          | S2 |
| Citations and Notes                                                                    | S6 |
| <sup>1</sup> H and <sup>13</sup> C NMR Spectra for Compounds <b>2</b> and <b>3a–3o</b> | S7 |

**Materials and Methods.** Reactions employed oven- or flame-dried glassware under argon unless otherwise noted. THF, diethyl ether, benzene and toluene were distilled from sodium/benzophenone ketyl under argon. CH<sub>2</sub>Cl<sub>2</sub> was distilled from CaH<sub>2</sub> under argon or nitrogen. Alternatively, these solvents were purchased inhibitor-free and were sparged with argon and passed through columns of activated alumina prior to use (dropwise addition of blue benzophenone ketyl solution revealed the THF purified in this manner sustained the blue color more readily than the control sample purified by distillation). Argon was passed successively through columns of anhydrous CaSO<sub>4</sub> and R3-11 catalyst for removal of water and oxygen, respectively. All other materials were used as received from commercial sources unless otherwise noted. Thin layer chromatography (TLC) employed glass 0.25 mm silica gel plates with UV indicator. Flash chromatography columns were packed with 230-400 mesh silica gel as a slurry in the hexane. Gradient flash chromatography was conducted by adsorption of product mixtures on silica gel, packing over a short pad of clean silica gel as a slurry in hexane, and eluting with a continuous gradient from hexane to the indicated solvent. Melting points were determined on a Meltemp apparatus and uncorrected. Nuclear magnetic resonance (NMR) data were obtained at operating frequencies of 600 or 300 MHz for <sup>1</sup>H and 75 MHz for <sup>13</sup>C. Infrared spectra were recorded using a single beam FT-IR spectrophotometer by standard transmission methods or by use of an attenuated total reflectance (ATR) probe. Optical rotations were determined using a digital polarimeter operating at ambient temperature. Low resolution mass spectra were obtained using sample introduction by dip,

liquid chromatography or gas chromatography. Stereoisomer ratio analyses employed HPLC with Microsorb-MV Si 8um 100A or Chiralcel OD columns (2-propanol/hexane as mobile phase).

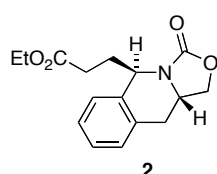

**Ethyl 3-((5R,10aS)-3-oxo-3,5,10,10a-tetrahydro-1H-oxazolo[3,4-b]isoquinolin-5-yl)propanoate (2).** To a solution of **1a**<sup>1</sup> (120 mg, 0.59 mmol) and ethyl iodoacetate (0.72 mL, 6.1 mmol) in CH<sub>2</sub>Cl<sub>2</sub> (0.2 M) at –78° was added O<sub>2</sub> (4.2 mL) and a solution of Et<sub>3</sub>B (1 M in hexane, 1.2 mL, 1.2 mmol) in CH<sub>2</sub>Cl<sub>2</sub> (3 mL) by syringe pump concurrently over 5 h, using two syringes. The reaction mixture was allowed to warm slowly to room temperature. After 12 h, the reaction mixture was partitioned between CH<sub>2</sub>Cl<sub>2</sub> and saturated sodium thiosulfate solution, and the organic phase was washed with brine and dried over NaSO<sub>4</sub>. Concentration and flash chromatography (petroleum ether/EtOAc) afforded **2** (82 mg, 48% yield) as a colorless oil; [α]<sub>D</sub><sup>23</sup> –138 (c 0.56, CHCl<sub>3</sub>); IR (film) 2974, 2929, 1752, 1724, 1413, 1270, 1176, 1147, 1062 cm<sup>–1</sup>; <sup>1</sup>H NMR (600 MHz, CDCl<sub>3</sub>) δ 7.25–7.09 (m, 4H), 4.91 (dd, *J* = 10.6, 3.5 Hz, 1H), 4.50 (dd, *J* = 8.5, 7.8 Hz, 1H), 4.17 (dd, *J* = 8.8, 2.8 Hz, 1H), 4.15 (q, *J* = 7.1 Hz, 1H), 4.14 (q, *J* = 7.1 Hz, 1H), 4.08 (m, apparent qd, *J* = 8, 2.7 Hz, 1H), 2.90 (d, *J* = 7.84 Hz, 2H), 2.53 (ABX<sub>2</sub>, Δ*v*<sub>AB</sub> = 32.5 Hz, *J*<sub>AB</sub> = 19.1 Hz, *J*<sub>AX</sub> = 7.3, 7.3 Hz, *J*<sub>BX</sub> = 7.3, 6.8 Hz, 2H), 2.27 (dddd, *J* = 14.5, 7.4, 7.4, 3.5 Hz, 1H), 2.06 (dddd, *J* = 14.3, 10.6, 7.5, 6.8 Hz, 1H), 1.28 (t, *J* = 7.1 Hz, 3H); <sup>13</sup>C NMR (75 MHz, CDCl<sub>3</sub>) δ 173.2, 157.3, 135.4, 131.3, 129.4, 127.1, 127.0, 126.9, 68.3, 60.6, 52.5, 48.1, 33.7, 31.8, 31.1, 14.2; MS (EI) *m/z* (relative intensity) 289 (M<sup>+</sup>, 1%), 244 ([M–OEt]<sup>+</sup>, 5%), 188 (100%); Anal. Calcd. for C<sub>16</sub>H<sub>19</sub>NO<sub>4</sub>: C, 66.42; H, 6.62; N, 4.84. Found: C, 66.59; H, 6.70; N, 4.69.

### General Procedure: Synthesis of Substituted *N*-Vinyloxazolidinone Derivatives

A solution of the *N*-vinyl oxazolidinone (**1a–1d**), α-iodoester or α-iodoacetonitrile (3 equiv), NEt<sub>3</sub> (0.5 equiv) in benzene (0.01 M) was deoxygenated by sparging with argon through a syringe needle. The mixture was heated to reflux, and solutions of AIBN (0.05 equiv) in benzene (0.05 M) and Bu<sub>3</sub>SnH (2 equiv) in benzene (0.2 M) were added simultaneously via syringe pump over 10 h. Heating was continued for ca. 12 h. For reactions employing α-bromoesters, NBu<sub>4</sub>I (1 equiv) was included in the initial reaction mixture. In certain cases, and as indicated below, *i*-Pr<sub>2</sub>NEt was substituted for NEt<sub>3</sub>.

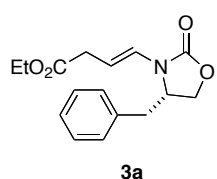

**Ethyl (S,E)-4-(4-benzyl-2-oxooxazolidin-3-yl)but-3-enoate (3a).** From **1a** (60 mg, 0.29 mmol), AIBN (24 mg, 0.15 mmol), Bu<sub>3</sub>SnH (0.16 mL, 0.59 mmol), ethyl iodoacetate (0.10 mL, 0.845 mmol) and NEt<sub>3</sub> (0.02 mL, 0.14 mmol), following the General Procedure, was obtained **3a** (64 mg, 76% yield) as a colorless oil; [α]<sub>D</sub><sup>25</sup> +40.5 (c 0.65, CHCl<sub>3</sub>); IR (film) 2970, 1752, 1735, 1670, 1417, 1241, 1172, 1100, 1032 cm<sup>–1</sup>; <sup>1</sup>H NMR (300 MHz, CDCl<sub>3</sub>) δ 7.39–7.18 (m, 5H) 6.70 (dd, *J* = 14.7, 1.1 Hz, 1H), 5.20 (ddd, *J* = 14.7, 7.3, 7.3 Hz, 1H), 4.34–4.15 (m, 5H) 3.25 (dd, *J* = 13.9, 2.9 Hz, 1H), 3.16 (m, apparent d, *J* = 7.3 Hz, 2H), 2.80 (dd, *J* = 13.9, 8.6 Hz, 1H), 1.22 (t, *J* = 7.1 Hz, 3H); <sup>13</sup>C NMR (75 MHz, CDCl<sub>3</sub>) δ 171.8, 154.9, 135.1, 129.3, 128.9, 127.3, 125.6, 103.3, 66.5, 60.9, 54.8, 35.9, 35.4, 14.2; MS (EI) *m/z* (relative intensity) 289 (M<sup>+</sup>, 15%), 243 (13%), 198 (100%); Anal. Calcd. for C<sub>16</sub>H<sub>19</sub>NO<sub>4</sub>: C, 66.42; H, 6.62; N, 4.84. Found: C, 66.35; H, 6.77; N, 4.78.

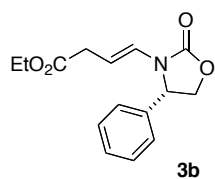**Ethyl (S,E)-4-(2-oxo-4-phenyloxazolidin-3-yl)but-3-enoate (3b).**

From **1b**<sup>1</sup> (100 mg, 0.53 mmol), AIBN (42 mg, 0.26 mmol), Bu<sub>3</sub>SnH (0.29 mL, 1.08 mmol), ethyl iodoacetate (0.19 mL, 1.6 mmol) and NEt<sub>3</sub> (0.08 mL, 0.58 mmol), following the General Procedure, was obtained **3b** (100 mg, 69% yield) as a colorless oil;  $[\alpha]_D^{25} +99.6$  (*c* 0.48, CHCl<sub>3</sub>); IR (film) 2981, 2919, 1761, 1732, 1675, 1405, 1221, 1192, 1159, 1103, 1035 cm<sup>-1</sup>; <sup>1</sup>H NMR (300 MHz, CDCl<sub>3</sub>)  $\delta$  7.43-7.24 (m, 5 H), 6.70 (ddd, *J* = 14.6, 1.1, 1.1 Hz, 1H), 5.05 (dd, *J* = 9.0, 5.2 Hz, 1H), 4.75-4.65 (m, 2H), 4.12 (dd, *J* = 8.7, 5.3 Hz, 1H), 4.03 (q, *J* = 7.1 Hz, 2H), 2.91 (dd, *J* = 7.4, 1.1 Hz, 2H), 1.16 (t, *J* = 7.1 Hz, 3H); <sup>13</sup>C NMR (75 MHz, CDCl<sub>3</sub>)  $\delta$  171.5, 155.6, 137.9, 129.4, 128.8, 125.9, 125.6, 104.7, 70.6, 60.7, 58.5, 35.5, 14.1; MS (EI) *m/z* (relative intensity) 275 (M<sup>+</sup>, 7%), 229 (12%), 202 (67%), 91 (100%); Anal. Calcd. for C<sub>15</sub>H<sub>17</sub>NO<sub>4</sub>: C, 65.44; H, 6.22; N, 5.09. Found: C, 65.40; H, 6.52; N, 4.86.

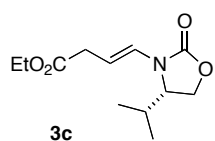**Ethyl (S,E)-4-(4-isopropyl-2-oxooxazolidin-3-yl)but-3-enoate (3c).**

From **1c**<sup>1</sup> (45 mg, 0.29 mmol), AIBN (24 mg, 0.15 mmol), Bu<sub>3</sub>SnH (0.16 mL, 0.59 mmol), ethyl iodoacetate (0.10 mL, 0.845 mmol) and *i*-Pr<sub>2</sub>NEt (0.05 mL, 0.29 mmol), following the General Procedure, was obtained **3c** (50 mg, 72% yield) as a colorless oil;  $[\alpha]_D^{22} +28.0$  (*c* 1.1, CHCl<sub>3</sub>); IR (film) 2964, 1754, 1726, 1673, 1413, 1159, 1104, 1051, 1027 cm<sup>-1</sup>; <sup>1</sup>H NMR (300 MHz, CDCl<sub>3</sub>)  $\delta$  6.63 (d, *J* = 15.0 Hz, 1H), 5.04 (ddd, *J* = 14.7, 7.3, 7.3 Hz, 1H), 4.31-4.20 (m, 2H), 4.15 (q, *J* = 7.14 Hz, 2H), 4.05 (ddd, *J* = 8.4, 3.4, 3.4 Hz, 1H), 3.12-3.04 (m, 2H), 2.44 (m, apparent septet of doublets, *J* = 6.9, 3.4 Hz, 1H), 1.26 (t, *J* = 7.14 Hz, 3H), 0.92 (d, *J* = 7.08 Hz, 3H), 0.83 (d, *J* = 6.82 Hz, 3H); <sup>13</sup>C NMR (75 MHz, CDCl<sub>3</sub>)  $\delta$  171.9, 155.5, 125.6, 103.2, 62.9, 60.8, 58.2, 35.4, 25.9, 17.8, 14.1, 13.8; MS (EI) *m/z* (relative intensity) 241.1 (M<sup>+</sup>, 25%), 198 (32%), 195 (12%), 168 (100%); HRMS, calculated for C<sub>12</sub>H<sub>19</sub>NO<sub>4</sub>: 241.1314, found: 241.1311.

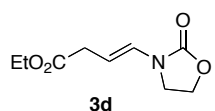**Ethyl (E)-4-(2-oxooxazolidin-3-yl)but-3-enoate (3d).**

From **1d**<sup>1</sup> (59 mg, 0.52 mmol), AIBN (48 mg, 0.29 mmol), Bu<sub>3</sub>SnH (0.28 mL, 1.04 mmol), ethyl iodoacetate (0.19 mL, 1.6 mmol) and NEt<sub>3</sub> (0.04 mL, 0.29 mmol), following the General Procedure, was obtained **3d** (70 mg, 68% yield) as a colorless oil; IR (film) 2984, 2925, 1755, 1726, 1674, 1481, 1423, 1245, 1200, 1107, 1067, 1031 cm<sup>-1</sup>; <sup>1</sup>H NMR (300 MHz, CDCl<sub>3</sub>)  $\delta$  6.76 (d, *J* = 14.4 Hz, 1H), 4.91 (ddd, *J* = 14.4, 7.3, 7.3 Hz, 1H), 4.44 (dd, *J* = 9.4, 7.8 Hz, 2H), 4.15 (q, *J* = 7.1 Hz, 2H), 3.73 (dd, *J* = 8.5, 7.7 Hz, 2H), 3.09 (d, *J* = 7.3 Hz, 2H), 1.27 (t, *J* = 7.1 Hz, 3H); <sup>13</sup>C NMR (300 MHz, CDCl<sub>3</sub>)  $\delta$  171.8, 155.2, 126.7, 102.4, 62.2, 60.8, 42.4, 35.1, 14.1; MS (EI) *m/z* (relative intensity) 199 (M<sup>+</sup>, 15%), 153 (7%), 126 (100%); Anal. Calcd. for C<sub>9</sub>H<sub>13</sub>NO<sub>4</sub>: C, 54.26; H, 6.58; N, 7.03. Found: C, 53.79; H, 6.80; N, 6.64.

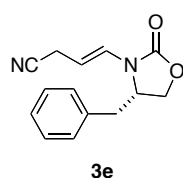**(S,E)-4-(4-Benzyl-2-oxooxazolidin-3-yl)but-3-enenitrile (3e).**

From **1a** (100 mg, 0.49 mmol), AIBN (40 mg, 0.24 mmol), Bu<sub>3</sub>SnH (0.26 mL, 0.97 mmol), iodoacetone nitrile (0.1 mL, 1.4 mmol) and NEt<sub>3</sub> (0.03 mL, 0.22 mmol), following the General Procedure B, was obtained **3e** (80 mg, 67% yield) as a colorless solid; mp 80–82 °C,  $[\alpha]_D^{25} +6.0$  (*c* 1.5, CHCl<sub>3</sub>); IR (film) 2920, 2252, 1755, 1674, 1413, 1238, 1100 cm<sup>-1</sup>; <sup>1</sup>H NMR (300 MHz, CDCl<sub>3</sub>)  $\delta$  7.38-7.16 (m, 5H), 6.85 (ddd, *J* = 14.5, 1.4, 1.4 Hz, 1H), 5.00 (ddd, *J* = 14.5, 6.5, 6.5 Hz, 1H), 4.29-4.20 (m, 3H), 3.23-3.17 (m, 3H), 2.84-2.76 (m, 1H); <sup>13</sup>C NMR (75 MHz, CDCl<sub>3</sub>)  $\delta$  154.8, 134.7, 129.2, 129.0, 127.5, 127.5, 117.5, 98.8, 66.7, 54.9, 36.4, 18.5; MS (EI) *m/z*

(relative intensity) 242 ( $M^+$ , 17%), 171 (9%), 151 (100%); Anal. Calcd. for  $C_{14}H_{14}N_2O_2$ : C, 69.41; H, 5.82; N, 11.56. Found: C, 69.14; H, 5.83; N, 11.49.

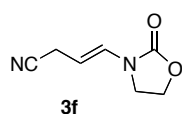

**(E)-4-(2-Oxooxazolidin-3-yl)but-3-enitrile (3f).** From **1d** (50 mg, 0.44 mmol), AIBN (36 mg, 0.22 mmol),  $Bu_3SnH$  (0.24 mL, 0.89 mmol), iodoacetonitrile (0.10 mL, 1.4 mmol) and  $NEt_3$  (0.03 mL, 0.22 mmol), following the General Procedure, was obtained **3f** (44 mg, 66% yield) as a colorless solid; mp 90–93 °C; IR (film) 2925, 2250, 1754, 1478, 1424, 1228, 1102, 1041, 958  $cm^{-1}$ ;  $^1H$  NMR (300 MHz,  $CDCl_3$ )  $\delta$  6.94 (dt,  $J = 14.3, 1.4$  Hz, 1H), 4.73 (dt,  $J = 14.2, 6.6$  Hz, 1H), 4.51–4.45 (m, 2H), 3.72 (dd,  $J = 8.9, 7.2$  Hz, 2H), 3.16 (dd,  $J = 6.6, 1.4$  Hz, 2H);  $^{13}C$  NMR (75 MHz,  $CDCl_3$ )  $\delta$  155.0, 128.5, 117.5, 98.0, 62.2, 42.3, 18.2; MS (EI)  $m/z$  (relative intensity) 152 ( $M^+$ , 86%), 107 (71%), 93 (100%); HRMS, calculated for  $C_7H_8N_2O_2$ : 152.0586, found: 152.0584.

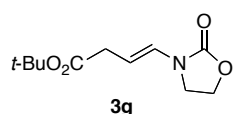

**tert-Butyl (E)-4-(2-oxooxazolidin-3-yl)but-3-enoate (3g).** From **1d** (40 mg, 0.35 mmol), AIBN (29 mg, 0.18 mmol),  $Bu_3SnH$  (0.19 mL, 0.71 mmol), *tert*-butyl 2-bromoacetate (0.15 mL, 1.0 mmol),  $NBu_4I$  (0.13 g, 0.35 mmol) and  $NEt_3$  (0.03 mL, 0.22 mmol), following the General Procedure, was obtained **3g** (51 mg, 63% yield) as a colorless oil; IR (film) 2978, 2930, 1764, 1727, 1674, 1481, 1422, 1242, 1149  $cm^{-1}$ ;  $^1H$  NMR (300 MHz,  $CDCl_3$ )  $\delta$  6.73 (d,  $J = 14.4$  Hz, 1H), 4.90 (dt,  $J = 14.5, 7.3$  Hz, 1H), 4.46–4.41 (m, 2H), 3.73 (dd,  $J = 8.9, 7.2$  Hz, 2H), 3.01 (dd,  $J = 7.3, 1.3$  Hz, 2H), 1.45 (s, 9H);  $^{13}C$  NMR (75 MHz,  $CDCl_3$ )  $\delta$  171.2, 155.3, 126.4, 103.0, 80.9, 62.2, 42.4, 36.2, 28.0; MS (EI)  $m/z$  (relative intensity) 227 ( $M^+$ , 6%), 126 (100%), 57 (88%); Anal. Calcd. for  $C_{11}H_{17}NO_4$ : C, 58.14; H, 7.54; N, 6.16. Found: C, 58.42; H, 7.72; N, 5.98.

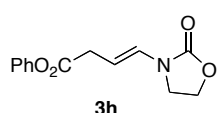

**Phenyl (E)-4-(2-oxooxazolidin-3-yl)but-3-enoate (3h).** From **1d** (40 mg, 0.35 mmol), AIBN (29 mg, 0.18 mmol),  $Bu_3SnH$  (0.19 mL, 0.71 mmol), phenyl 2-bromoacetate (226 mg, 1.05 mmol),  $NBu_4I$  (129 mg, 0.35 mmol) and  $NEt_3$  (0.02 mL, 0.14 mmol), following the General Procedure, was obtained **3h** (56 mg, 65% yield) as a colorless oil; IR (film) 1749, 1673, 1481, 1420, 1193, 1133  $cm^{-1}$ ;  $^1H$  NMR (300 MHz,  $CDCl_3$ )  $\delta$  7.41–7.07 (m, 5H), 6.87 (d,  $J = 14.4$  Hz, 1H), 4.99 (dt,  $J = 14.4, 7.3$  Hz, 1H), 4.49–4.43 (m, 2H), 3.76 (dd,  $J = 8.9, 7.2$  Hz, 2H), 3.36 (dd,  $J = 7.3, 1.3$  Hz, 2H);  $^{13}C$  NMR (75 MHz,  $CDCl_3$ )  $\delta$  170.3, 155.3, 150.6, 129.4, 127.4, 125.9, 121.4, 101.6, 62.2, 42.4, 35.2; MS (EI)  $m/z$  (relative intensity) 247 ( $M^+$ , 1%), 154 ( $[M-OPh]^+$ , 61%), 126 (100%); HRMS, calculated for  $C_{13}H_{13}NO_4$ : 247.0845, found: 247.0841.

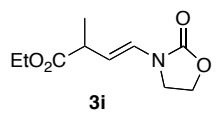

**Ethyl (E)-2-methyl-4-(2-oxooxazolidin-3-yl)but-3-enoate (3i).** From **1d** (60 mg, 0.52 mmol), AIBN (43 mg, 0.26 mmol),  $Bu_3SnH$  (0.28 mL, 1.04 mmol), ethyl 2-bromopropionate (0.20 mL, 1.54 mmol),  $NBu_4I$  (192 mg, 0.52 mmol) and  $NEt_3$  (0.04 mL, 0.29 mmol), following the General Procedure, was obtained **3i** (64 mg, 58% yield) as a colorless oil; IR (film) 2979, 2930, 1758, 1731, 1670, 1481, 1416, 1225, 1081, 1034  $cm^{-1}$ ;  $^1H$  NMR (300 MHz,  $CDCl_3$ )  $\delta$  6.76 (d,  $J = 14.4$  Hz, 1H), 4.90 (dd,  $J = 14.4, 8.4$  Hz, 1H), 4.47–4.41 (m, 2H), 4.13 (m, apparent q,  $J = 7.1$  Hz, 2H), 3.73–3.68 (m, 2H), 3.16 (m, apparent quintet,  $J = 8$  Hz, 1H), 1.30 (d,  $J = 7.1$  Hz, 3H), 1.26 (t,  $J = 7.1$  Hz, 3H);  $^{13}C$  NMR (75 MHz,  $CDCl_3$ )  $\delta$  174.8, 155.4, 125.2, 109.8, 62.2, 60.8, 42.4, 40.6, 18.1, 14.2; MS (EI)  $m/z$  (relative intensity) 213 ( $M^+$ , 9%), 140 ( $[M-CO_2Et]^+$ , 100%); HRMS, calculated for  $C_{10}H_{15}NO_4$ : 213.1001, found: 213.1000.

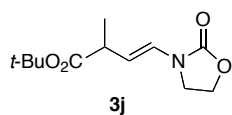**tert-Butyl (E)-2-methyl-4-(2-oxooxazolidin-3-yl)but-3-enoate (3j).**

From **1d** (60 mg, 0.52 mmol), AIBN (43 mg, 0.26 mmol), Bu<sub>3</sub>SnH (0.28 mL, 1.04 mmol), *tert*-butyl 2-bromopropanoate (0.26 mL, 1.56 mmol), NBu<sub>4</sub>I (192 mg, 0.52 mmol) and NEt<sub>3</sub> (0.04 mL, 0.29 mmol), following the General Procedure, was obtained **3j** (75 mg, 60% yield) as a colorless oil; IR (film) 2977, 2929, 1758, 1726, 1670, 1415, 1228, 1150, 1081, 1032 cm<sup>-1</sup>; <sup>1</sup>H NMR (300 MHz, CDCl<sub>3</sub>) δ 6.74 (d, *J* = 14.3 Hz, 1H), 4.90 (dd, *J* = 14.4, 8.3 Hz, 1H), 4.44 (dd, *J* = 8.9, 7.3 Hz, 2H), 3.71 (dd, *J* = 9.0, 7.2 Hz, 2H), 3.11–3.01(m, apparent quintet, *J* = 8 Hz, 1H), 1.44 (s, 9H), 1.26 (d, *J* = 7.1 Hz, 3H); <sup>13</sup>C NMR (75 MHz, CDCl<sub>3</sub>) δ 174.2, 155.4, 124.9, 110.3, 80.7, 62.2, 42.5, 41.5, 28.0, 18.3; MS (EI) *m/z* (relative intensity) 241.1 (M<sup>+</sup>, 20%), 140 ([M–CO<sub>2</sub>*t*-Bu]<sup>+</sup>, 100%); HRMS, calculated for C<sub>12</sub>H<sub>19</sub>NO<sub>4</sub>: 241.1314, found: 241.1315.

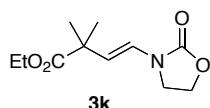**Ethyl (E)-2,2-dimethyl-4-(2-oxooxazolidin-3-yl)but-3-enoate (3k).**

From **1d** (60 mg, 0.52 mmol), AIBN (43 mg, 0.26 mmol), Bu<sub>3</sub>SnH (0.28 mL, 1.04 mmol), ethyl 2-bromo-2-methylpropionate (0.23 mL, 1.6 mmol), NBu<sub>4</sub>I (192 mg, 0.52 mmol) and NEt<sub>3</sub> (0.04 mL, 0.29 mmol), following the General Procedure, was obtained **3k** (26 mg, 22% yield) as a colorless oil; IR (film) 2978, 2925, 1754, 1726, 1667, 1481, 1415, 1223, 1144, 1084, 1031 cm<sup>-1</sup>; <sup>1</sup>H NMR (300 MHz, CDCl<sub>3</sub>) δ 6.74 (d, *J* = 14.7 Hz, 1H), 5.05 (d, *J* = 14.7 Hz, 1H), 4.44 (dd, *J* = 8.9, 7.2 Hz, 2H), 4.13 (q, *J* = 7.1 Hz, 2H), 3.71 (dd, *J* = 9.0, 7.1 Hz, 2H), 1.35 (s, 6H), 1.25 (t, *J* = 7.1 Hz, 3H); <sup>13</sup>C NMR (75 MHz, CDCl<sub>3</sub>) δ 176.4, 155.5, 123.4, 115.8, 62.1, 60.9, 42.7, 42.5, 25.5, 14.1; MS (EI) *m/z* (relative intensity) 227 (M<sup>+</sup>, 4%), 154 ([M–CO<sub>2</sub>Et]<sup>+</sup>, 100%); Anal. Calcd. for C<sub>11</sub>H<sub>17</sub>NO<sub>4</sub>: C, 58.14; H, 7.54; N, 6.16. Found: C, 58.21; H, 7.83; N, 5.78.

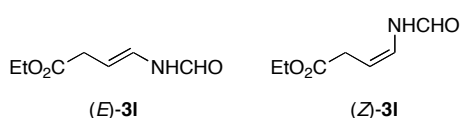**Ethyl 4-formamidobut-3-enoate (3l).**

From *N*-vinylformamide (**1e**, 0.04 mL, 0.57 mmol), AIBN (46 mg, 0.28 mmol), Bu<sub>3</sub>SnH (0.31 mL, 1.15 mmol), ethyl iodoacetate (0.20 mL, 1.7 mmol), *i*-Pr<sub>2</sub>NEt (0.10 mL, 0.57 mmol), following the General Procedure, was obtained **3l** (73 mg, *E/Z* = 1:1.4, 82% yield). The *E* and *Z* isomers were separated by rotary thin-layer chromatography to afford analytical samples, each of which exhibited two rotamers in its NMR spectra. (E)-**3l**: Colorless oil; IR (film) 1731, 1667, 1515, 1274, 1177, 1026 cm<sup>-1</sup>; <sup>1</sup>H NMR (300 MHz, CDCl<sub>3</sub>, mixture of rotamers, 2.7:1) major rotamer δ 8.26 (d, *J* = 11.4 Hz, 1H), 8.10 (s, 1H), 6.93–6.84 (dd, *J* = 14.3, 11.3 Hz, 1H), 5.35 (dt, *J* = 14.3, 7.4 Hz, 1H), 4.20–4.09 (m, 2H), 3.09–3.02 (m, 2H), 1.26 (t, *J* = 7.1 Hz, 3H); minor rotamer δ 8.28 (d, *J* = 11.1 Hz, 1H), 8.19 (s, 1H), 6.44 (dd, *J* = 13.9, 11.1 Hz, 1H), 5.22 (ddd, *J* = 14.5, 7.2, 6.6 Hz, 1H), 4.20–4.09 (m, 2H), 3.12–3.09 (m, 2H), 1.29–1.22 (m, 3H), some resonances were not resolved from the major rotamer; <sup>13</sup>C NMR (75 MHz, CDCl<sub>3</sub>) major rotamer δ 171.8, 158.5, 123.3, 103.1, 61.4, 32.0, 14.1; minor rotamer δ 171.0, 163.0, 125.0, 102.2, 61.2, 31.4, 14.1; MS (EI) *m/z* (relative intensity) 157 (M<sup>+</sup>, 18%), 84 (100%); HRMS calculated for C<sub>7</sub>H<sub>11</sub>NO<sub>3</sub>: 157.0739, found: 157.0743. (Z)-**3l**: Colorless oil; IR (film) 1730, 1665, 1510, 1397, 1260, 1179, 1031 cm<sup>-1</sup>; <sup>1</sup>H NMR (300 MHz, CDCl<sub>3</sub>, mixture of rotamers, 2.2:1) major rotamer δ 8.22 (s, 1H), 8.10 (br s, 1H), 6.94 (dd, *J* = 9.9, 9.6 Hz, 1H), 4.97 (ddd, apparent q, *J* = 8.1 Hz, 1H), 4.17 (q, *J* = 7.1 Hz, 2H), 3.07–3.03 (m, 2H), 1.28 (t, *J* = 7.1 Hz, 3H); minor rotamer δ 8.30 (d, *J* = 11.0 Hz, 1H), 8.10 (br s, 1H), 6.46 (dd, *J* = 11.1, 8.7 Hz, 1H), 4.91 (ddd, apparent q, *J* = 8.1 Hz, 1H), some resonances were not resolved from the major rotamer; <sup>13</sup>C NMR (75 MHz, C<sub>6</sub>D<sub>6</sub>) major rotamer δ 171.4, 157.5, 123.9, 105.5, 60.5, 35.0, 14.1; minor rotamer δ 171.1, 161.9, 126.4, 103.5, 60.5, 35.0, 14.2; MS (EI) *m/z* (relative intensity) 157 (M<sup>+</sup>, 14%), 84 (100%); HRMS, calculated for M<sup>+</sup>: 157.0739, found: 158.0741.

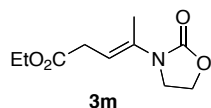

**Ethyl (E)-4-(2-oxooxazolidin-3-yl)pent-3-enoate (3m).** From **1f**<sup>2</sup> (64 mg, 0.50 mmol), AIBN (48 mg, 0.29 mmol), Bu<sub>3</sub>SnH (0.28 mL, 1.04 mmol), ethyl iodoacetate (0.19 mL, 1.6 mmol) and NEt<sub>3</sub> (0.04 mL, 0.29 mmol), following the General Procedure, was obtained **3m** (76 mg, 71% yield) as a colorless oil; IR (film) 2982, 2923, 1764, 1725, 1659, 1481, 1408, 1176, 1051 cm<sup>-1</sup>; <sup>1</sup>H NMR (300 MHz, CDCl<sub>3</sub>) δ 5.10 (m, apparent t, *J* = 7.2 Hz, 1H), 4.35 (dd, *J* = 8.7, 7.1 Hz, 2H), 4.15 (q, *J* = 7.1 Hz, 2H), 3.81 (dd, *J* = 8.7, 7.2 Hz, 2H), 3.11 (d, *J* = 7.2 Hz, 2H), 2.13 (d, *J* = 0.9 Hz, 3H), 1.27 (t, *J* = 7.1 Hz, 3H); <sup>13</sup>C NMR (75 MHz, CDCl<sub>3</sub>) δ 171.7, 155.1, 135.9, 105.9, 61.3, 60.8, 45.8, 32.6, 14.3, 14.2; MS (EI) *m/z* (relative intensity) 213 (M<sup>+</sup>, 10%), 167 (18%), 140 (100%); HRMS, calculated for C<sub>10</sub>H<sub>15</sub>NO<sub>4</sub>: 213.1001, found: 213.1002.

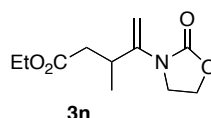

**Ethyl 3-methyl-4-(2-oxooxazolidin-3-yl)pent-4-enoate (3n).** From **1g**<sup>2</sup> (60 mg, 0.43 mmol), AIBN (35 mg, 0.21 mmol), Bu<sub>3</sub>SnH (0.23 mL, 0.86 mmol), ethyl iodoacetate (0.16 mL, 1.4 mmol) and NEt<sub>3</sub> (0.02 mL, 0.14 mmol), following the General Procedure, was obtained a mixture of alkene isomers<sup>3</sup> (40 mg, 34% yield), from which **3n** was separated as a colorless oil; IR (film) 2974, 2922, 1753, 1728, 1401, 1275, 1179, 1052 cm<sup>-1</sup>; <sup>1</sup>H NMR (300 MHz, CDCl<sub>3</sub>) δ 4.65 (s, 2H), 4.36 (t, *J* = 8.0 Hz, 2H), 4.12 (q, *J* = 7.1 Hz, 2H), 3.89-3.71 (m, 2H), 3.60 (m, apparent sextet, *J* = 7.1 Hz, 1H), 2.56 (dd, *J* = 15.3, 6.3 Hz, 1H), 2.36 (dd, *J* = 15.3, 7.8 Hz, 1H), 1.25 (t, *J* = 7.1 Hz, 3H), 1.18 (d, *J* = 6.9 Hz, 3H); <sup>13</sup>C NMR (75 MHz, CDCl<sub>3</sub>) δ 172.1, 155.0, 148.6, 98.8, 61.3, 60.4, 46.3, 40.5, 31.1, 19.3, 14.2; MS (EI) *m/z* (relative intensity) 227 (M<sup>+</sup>, 12%), 182 ([M-OEt]<sup>+</sup>, 65%), 137 (100%); HRMS, calculated for C<sub>11</sub>H<sub>17</sub>NO<sub>4</sub>: 227.1158, found: 227.1156.

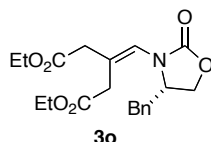

**Diethyl (S)-3-((4-benzyl-2-oxooxazolidin-3-yl)methylene)-pentanedioate (3o).** From **3a** (53 mg, 0.18 mmol), AIBN (15 mg, 0.091 mmol), Bu<sub>3</sub>SnH (0.10 mL, 0.37 mmol), ethyl iodoacetate (0.060 mL, 0.51 mmol) and NEt<sub>3</sub> (0.01 mL, 0.07 mmol), following the General Procedure, was obtained **3o** (20 mg, 30% yield) as a colorless oil; [α]<sub>D</sub><sup>25</sup> -48 (c 0.7, CHCl<sub>3</sub>); IR (film) 2980, 2922, 1754, 1737, 1726, 1407, 1368, 1257, 1174, 1092, 1029 cm<sup>-1</sup>; <sup>1</sup>H NMR (300 MHz, CDCl<sub>3</sub>) δ 7.35-7.15 (m, 5H), 6.06 (s, 1H), 4.3-4.10 (m, 7H), 3.33 (s, 2H), 3.28 (s, 2H), 3.16 (dd, *J* = 13.6, 3.4 Hz, 1H), 2.68 (dd, *J* = 13.7, 8.9 Hz, 1H), 1.27 (t, *J* = 7.1 Hz, 6H); <sup>13</sup>C NMR (75 MHz, CDCl<sub>3</sub>) δ 170.7, 170.2, 156.2, 135.1, 129.3, 128.9, 127.2, 124.3, 124.1, 66.5, 61.0, 60.9, 58.5, 40.1, 38.1, 36.0, 14.1 (2C); MS (EI) *m/z* (relative intensity) 375 (M<sup>+</sup>, 4%), 329 (41%), 91 (100%); HRMS, calculated for C<sub>20</sub>H<sub>25</sub>NO<sub>6</sub>: 375.1682, found: 375.1680.

## Citations and Notes

<sup>1</sup> (a) Gaulon, C.; Gizecki, P.; Dhal, R.; Dujardin, G. *Synlett* **2002**, 952-956. (b) Gaulon, C.; Dhal, R.; Dujardin, G. *Synthesis* **2003**, 2269-2272.

<sup>2</sup> Pan, X.; Cai, Q.; Ma, D. *Org. Lett.* **2004**, 6, 1809-1812.

<sup>3</sup> Other alkene isomer(s) were not be obtained in pure form suitable for full characterization. One alkene isomer exhibited the following data in spectra obtained from mixtures: <sup>1</sup>H NMR (300 MHz, CDCl<sub>3</sub>) δ 4.39 (dd, *J* = 9.2, 7.8 Hz, 2H), 4.14 (q, *J* = 7.1 Hz, 2H), 3.68 (dd, *J* = 9.2, 8.1 Hz, 2H), 3.11 (s, 2H), 1.86 (s, 3H), 1.76 (s, 3H), 1.27 (t, *J* = 7.1 Hz, 3H).

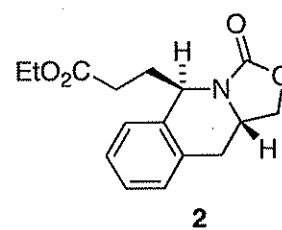

(<sup>1</sup>H NMR, 300 MHz)

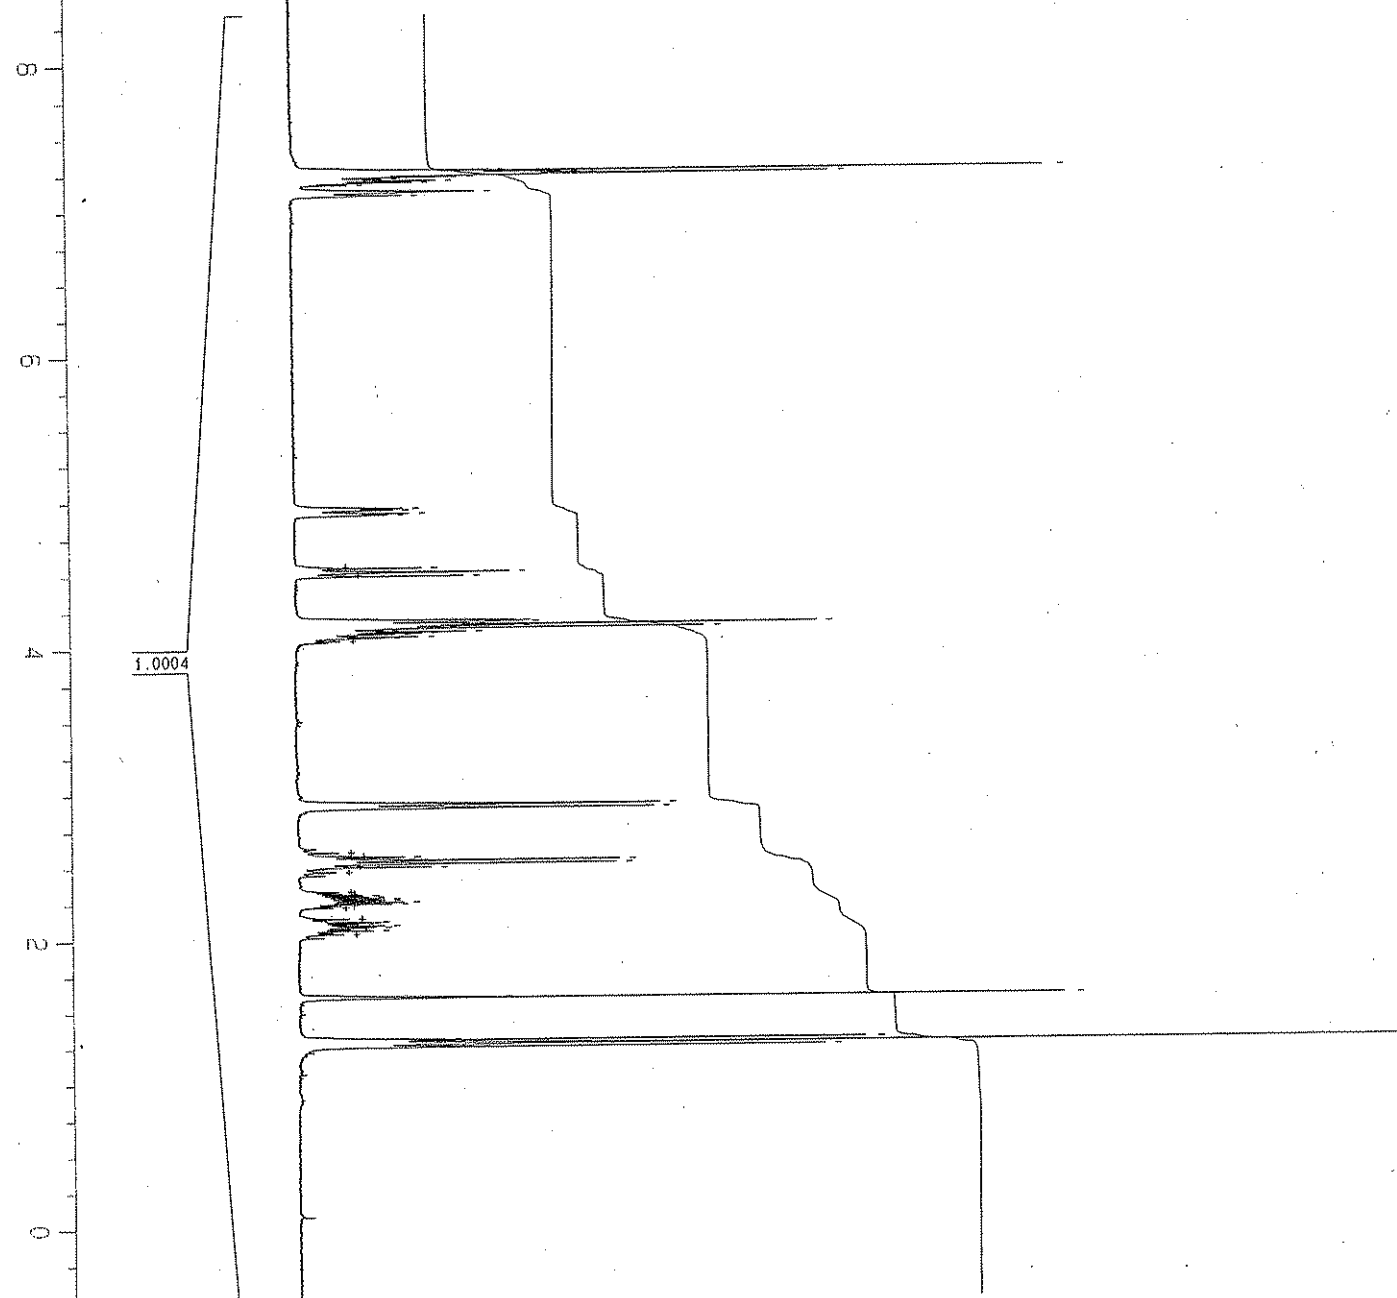

ppm

200

150

100

50

0

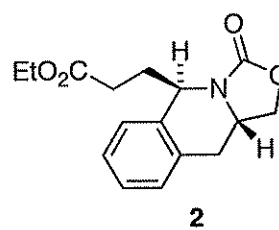



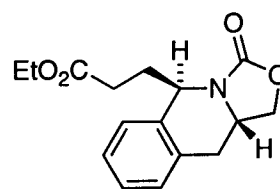

2

(<sup>1</sup>H NMR, 600 MHz)

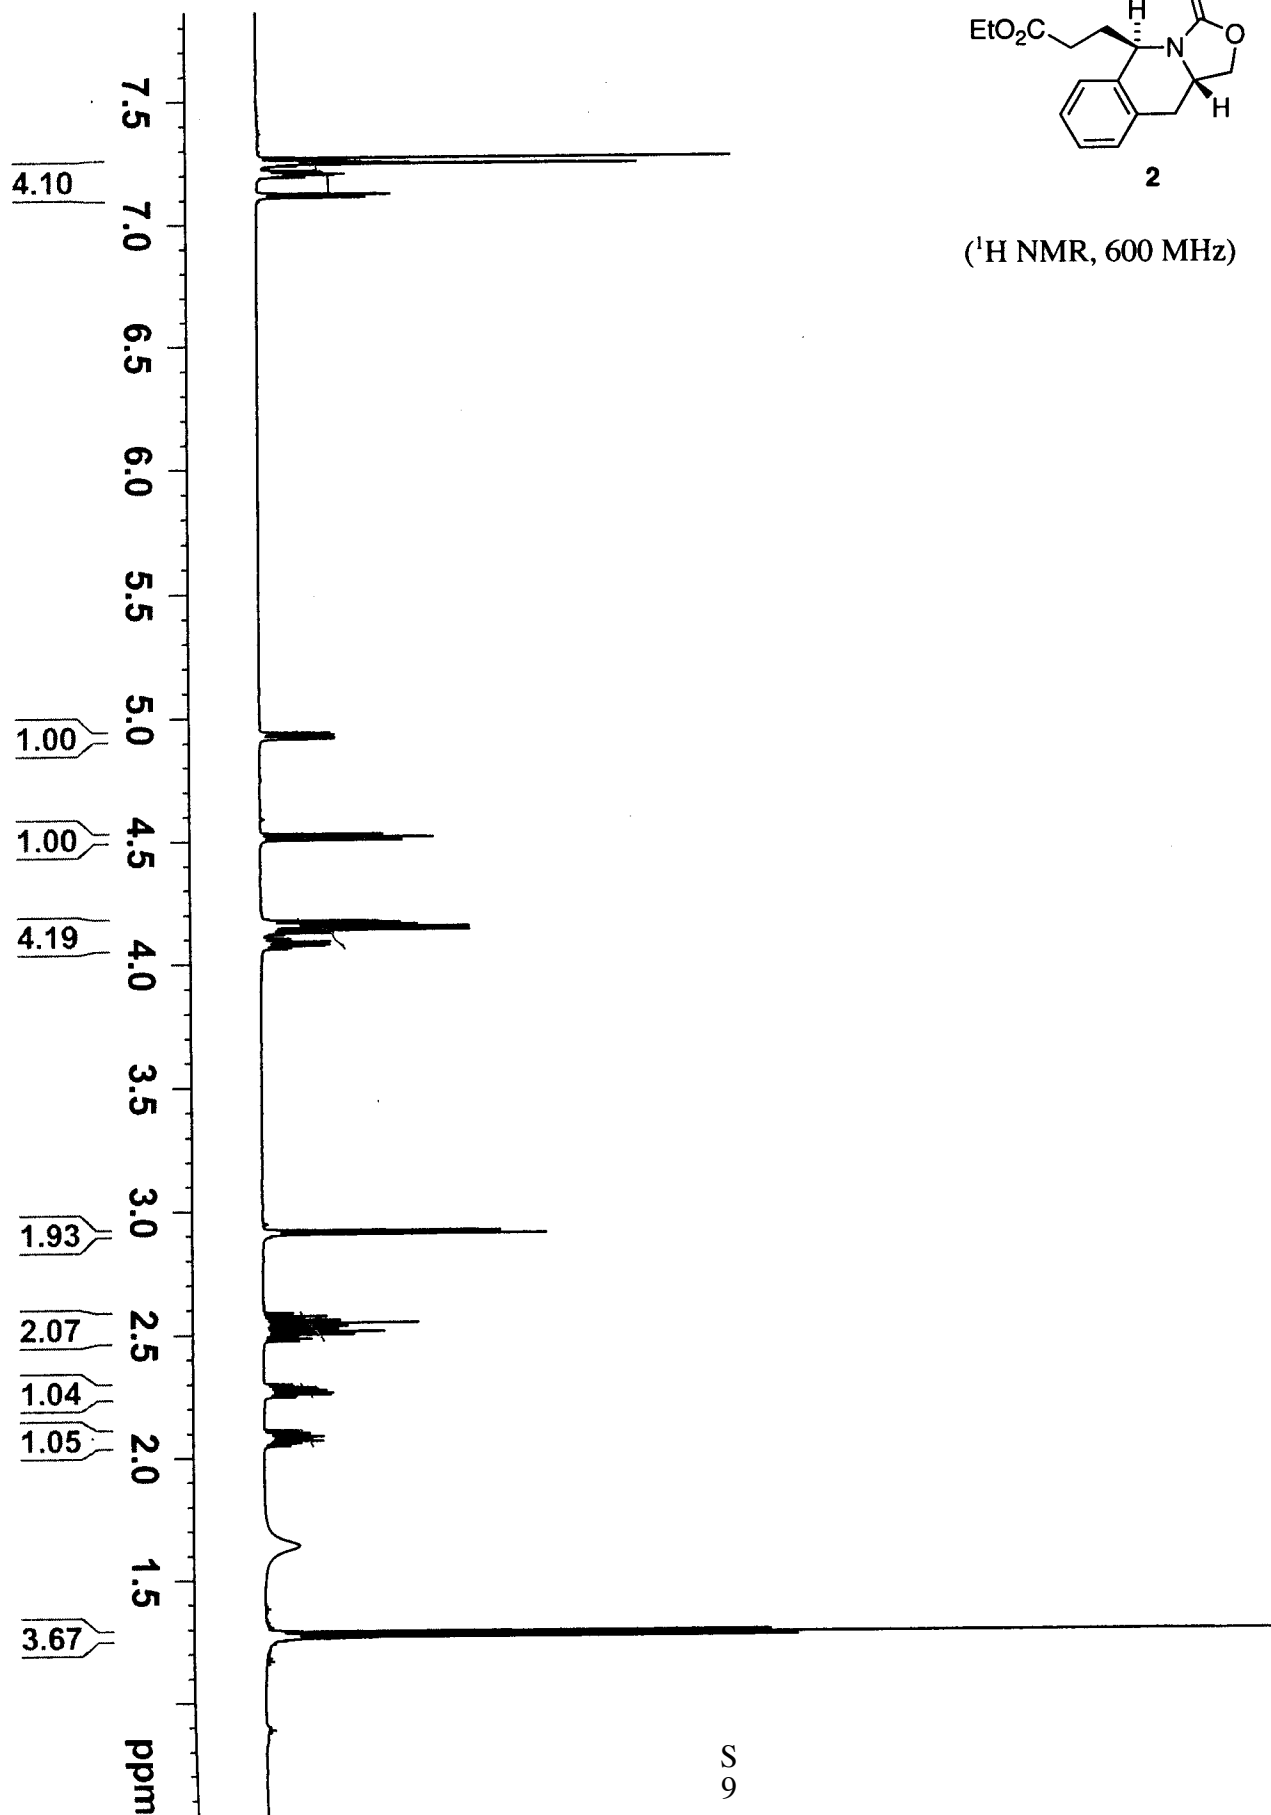

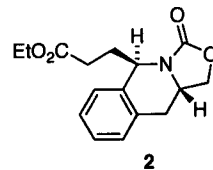

$^1\text{H}$ - $^1\text{H}$  COSY, 600 MHz

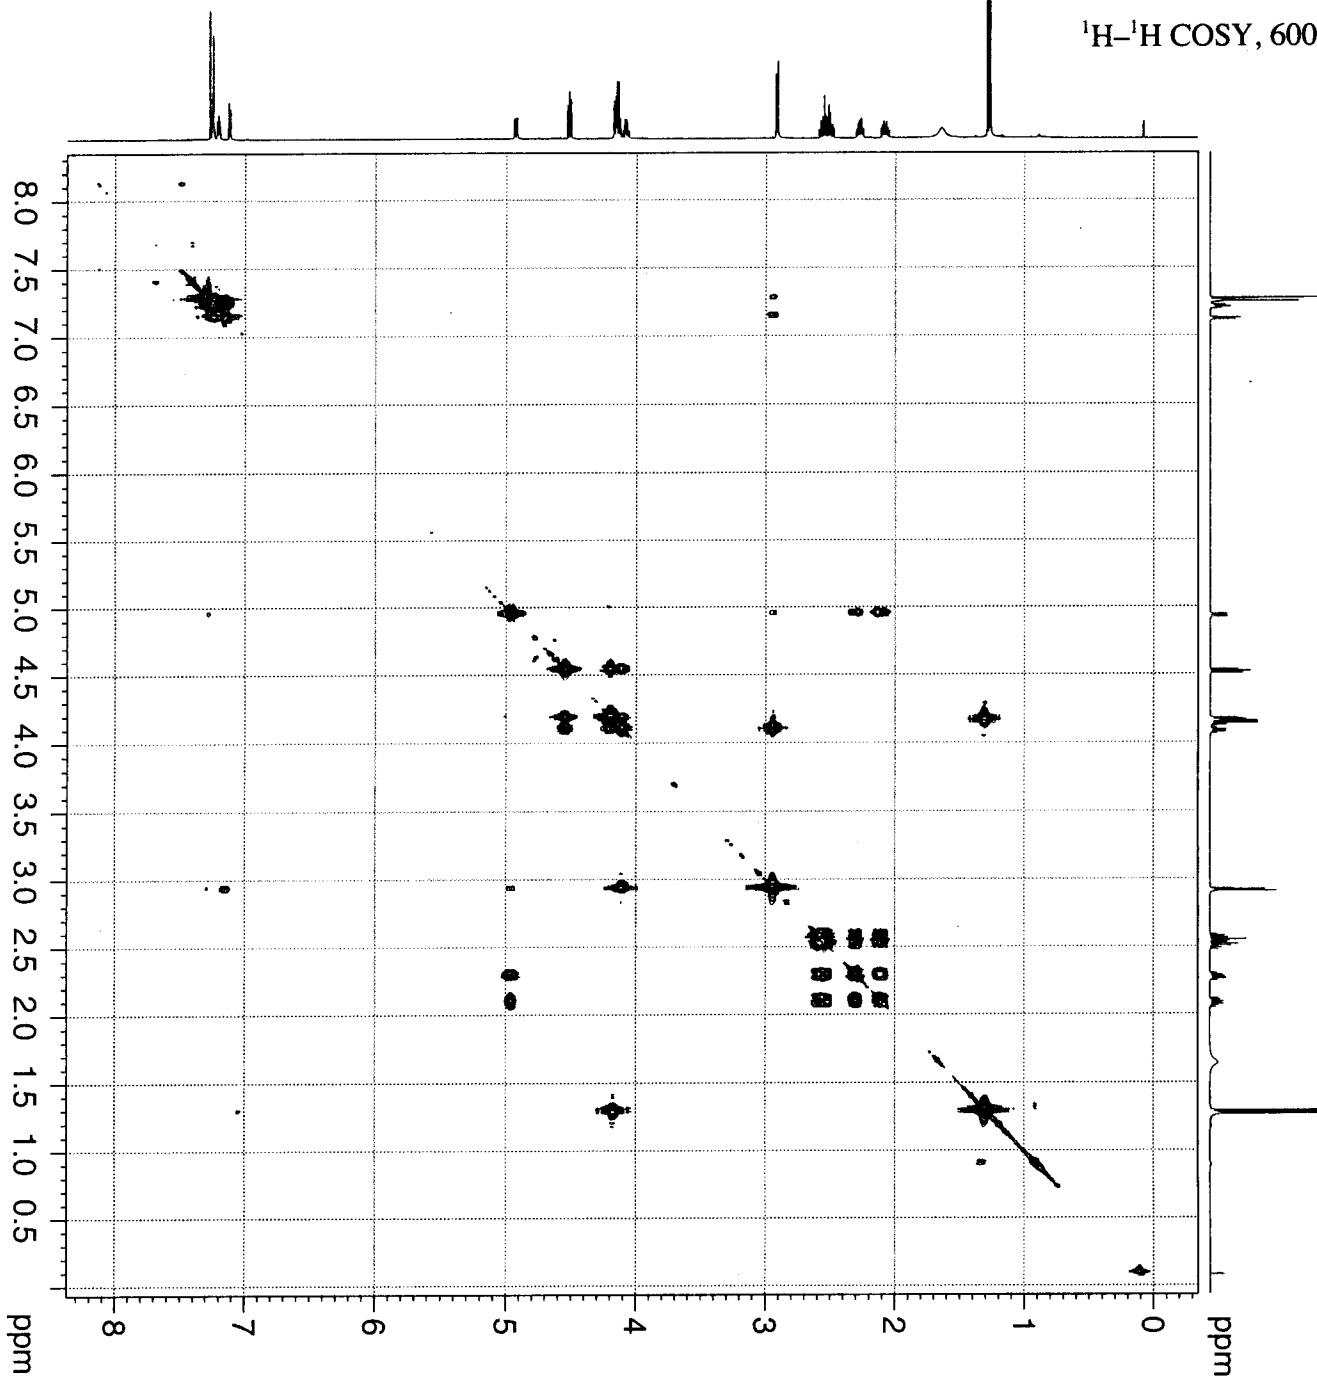

Current Data Parameters  
 Date\_ 20070801  
 Time\_ 11:24  
 INSTRUM spect  
 PROBD 5 mm TBI 1H/2H  
 PULPROG zgpg30  
 TD 4096  
 SOLVENT CDCl3  
 NS 16  
 DS 16  
 SWH 5896.227 Hz  
 FIDRES 1.439508 Hz  
 AQ 0.347456 sec  
 RG 90.5  
 DW 84.800 usec  
 DE 4.600 usec  
 TE 298.0 K usec  
 D0 0.00000300 sec  
 D1 4.00000000 sec  
 d13 0.00000400 sec  
 D16 0.00020000 sec  
 INO 0.00016960 sec  
 ===== CHANNEL f1 =====  
 NUC1 1H  
 P1 7.40 usec  
 PL1 -2.00 dB  
 SFO1 600.252137 MHz  
 ===== GRADIENT CHANNEL =====  
 GRAM1 SINE 100  
 GRAM2 SINE 100  
 GRZ1 20.00 V  
 GRZ2 20.00 V  
 P16 1000.00 usec  
 F1 - Acquisition parameters  
 NO 1  
 SFO1 600.252137 MHz  
 FIDRES 11.516068 Hz  
 SW 9.823 ppm  
 FPMODE QF  
 F2 - Processing parameters  
 SI 1024  
 SF 600.249901 MHz  
 WDW SINE  
 SSB 0  
 LB 0.00 Hz  
 GB 0  
 PC 0.50  
 F1 - Processing parameters  
 SI 1024  
 SF 600.249901 MHz  
 WDW SINE  
 SSB 0  
 LB 0.00 Hz  
 GB 0

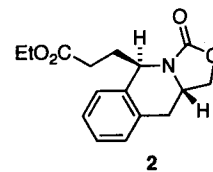

NOESY, 600 MHz

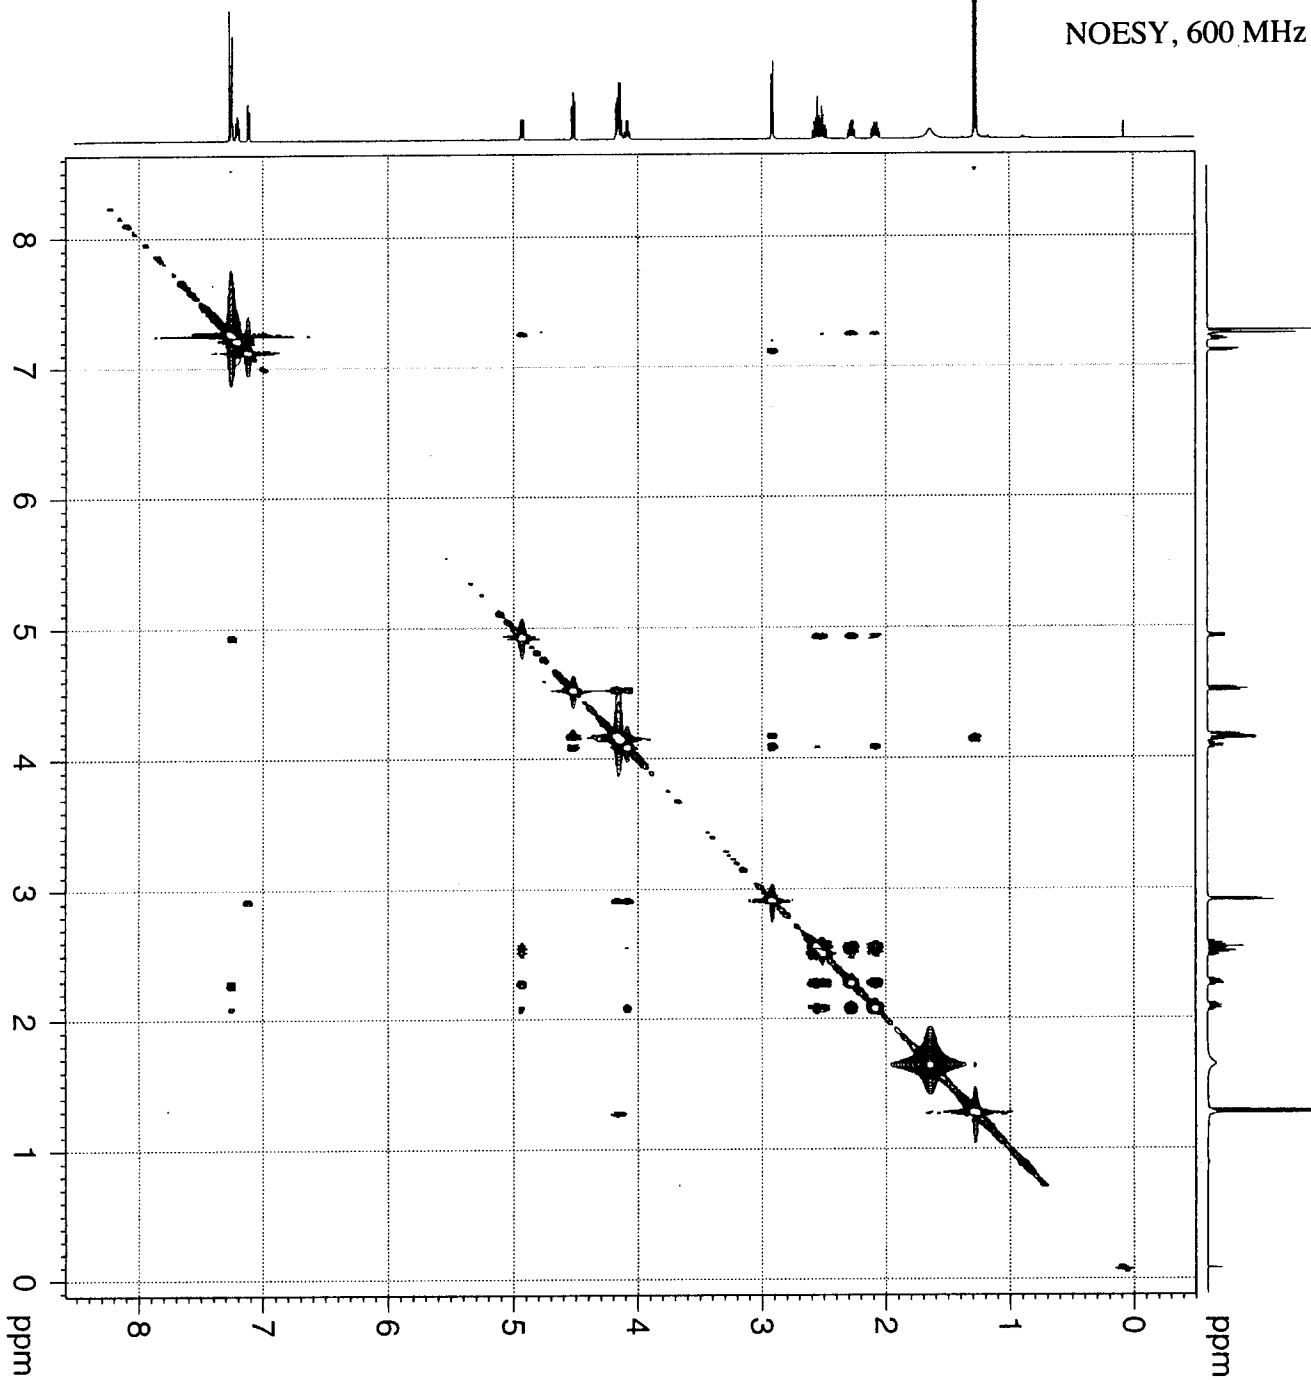

Current Data Parameters  
 NAME Wp-1-111-2  
 EXPNO 2  
 PROCNO 1  
 F2 - Acquisition Parameters  
 Date\_ 2007/11  
 Time 15:43  
 INSTRUM spect  
 PROBRD 5 mm TBI 1H/2H  
 PULPROG noesyph  
 TD 4096  
 SOLVENT CDCl3  
 NS 36  
 DS 3  
 SWH 5896.227 Hz  
 FIDRES 1.439508 Hz  
 AQ 0.3474756 sec  
 RG 90.5  
 DW 84.800 usec  
 DE 39.00 usec  
 TE 300.2 K  
 D0 0.00007518 sec  
 d1 4.00000000 sec  
 D8 0.92857140 sec  
 INO 0.00016960 sec  
 ===== CHANNEL f1 =====  
 NUC1 1H  
 P1 7.40 usec  
 PL1 -2.00 dB  
 SFO1 600.2521737 MHz  
 F1 - Acquisition Parameters  
 NDO 1  
 TD 512  
 FIDRES 600.2521737 MHz  
 SW 11.516058 Hz  
 FWHM 9.823 ppm  
 FMODE TPPI  
 F2 - Processing parameters  
 SI 2048  
 SF 600.250006 MHz  
 WDW Hanning  
 SSB 0  
 LB 0.00 Hz  
 GB 0  
 PC 0.50  
 F1 - Processing parameters  
 SI 32768  
 SF 600.250006 MHz  
 WDW Hanning  
 SSB 0  
 LB 0.00 Hz  
 GB 0

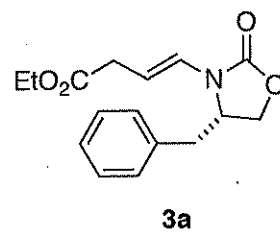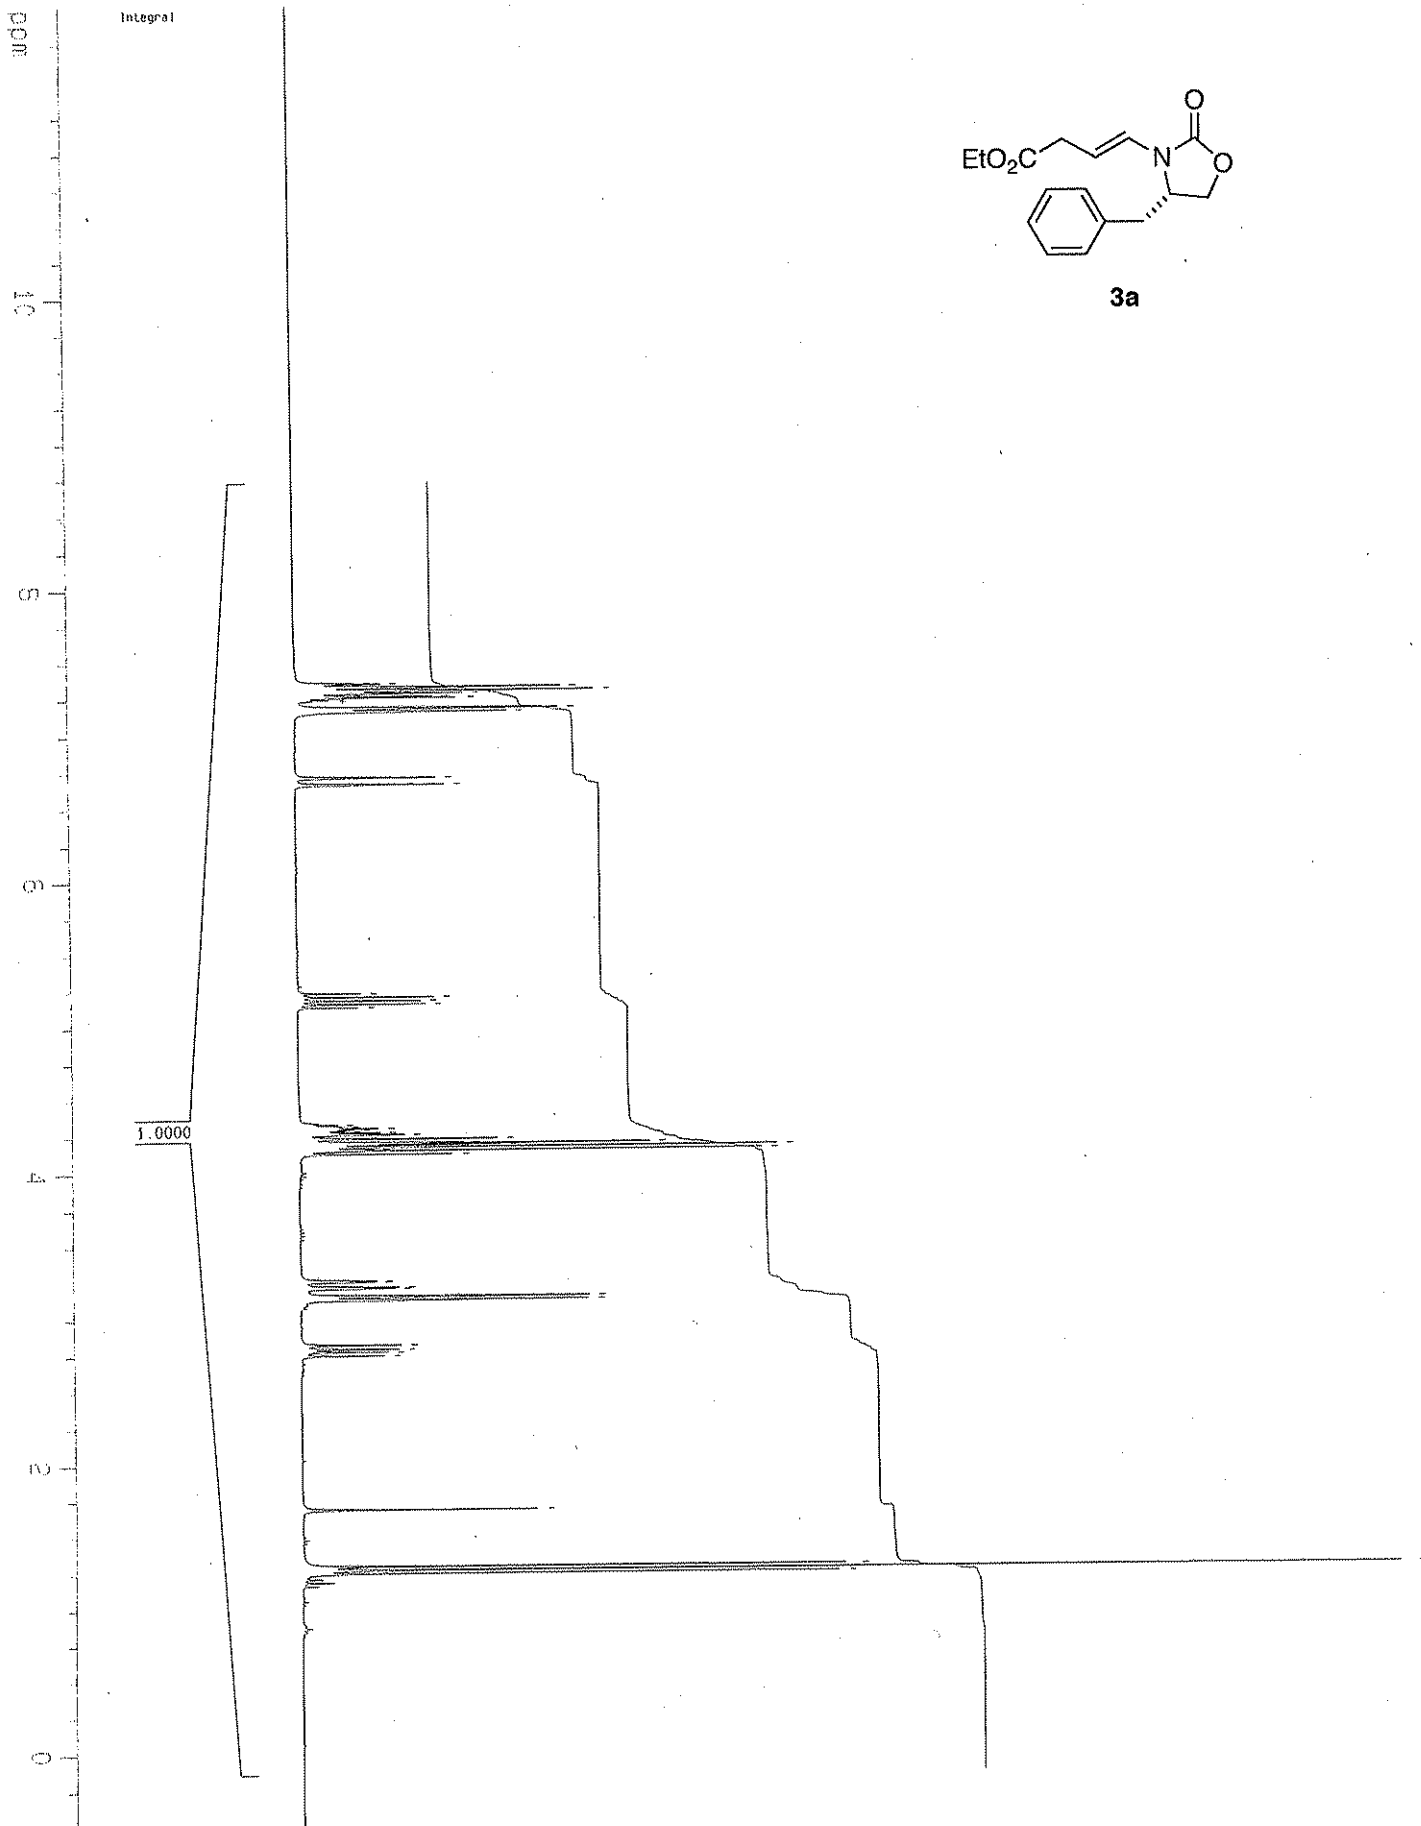

ppm 200 150 100 50 0

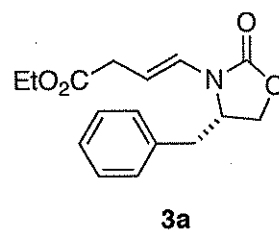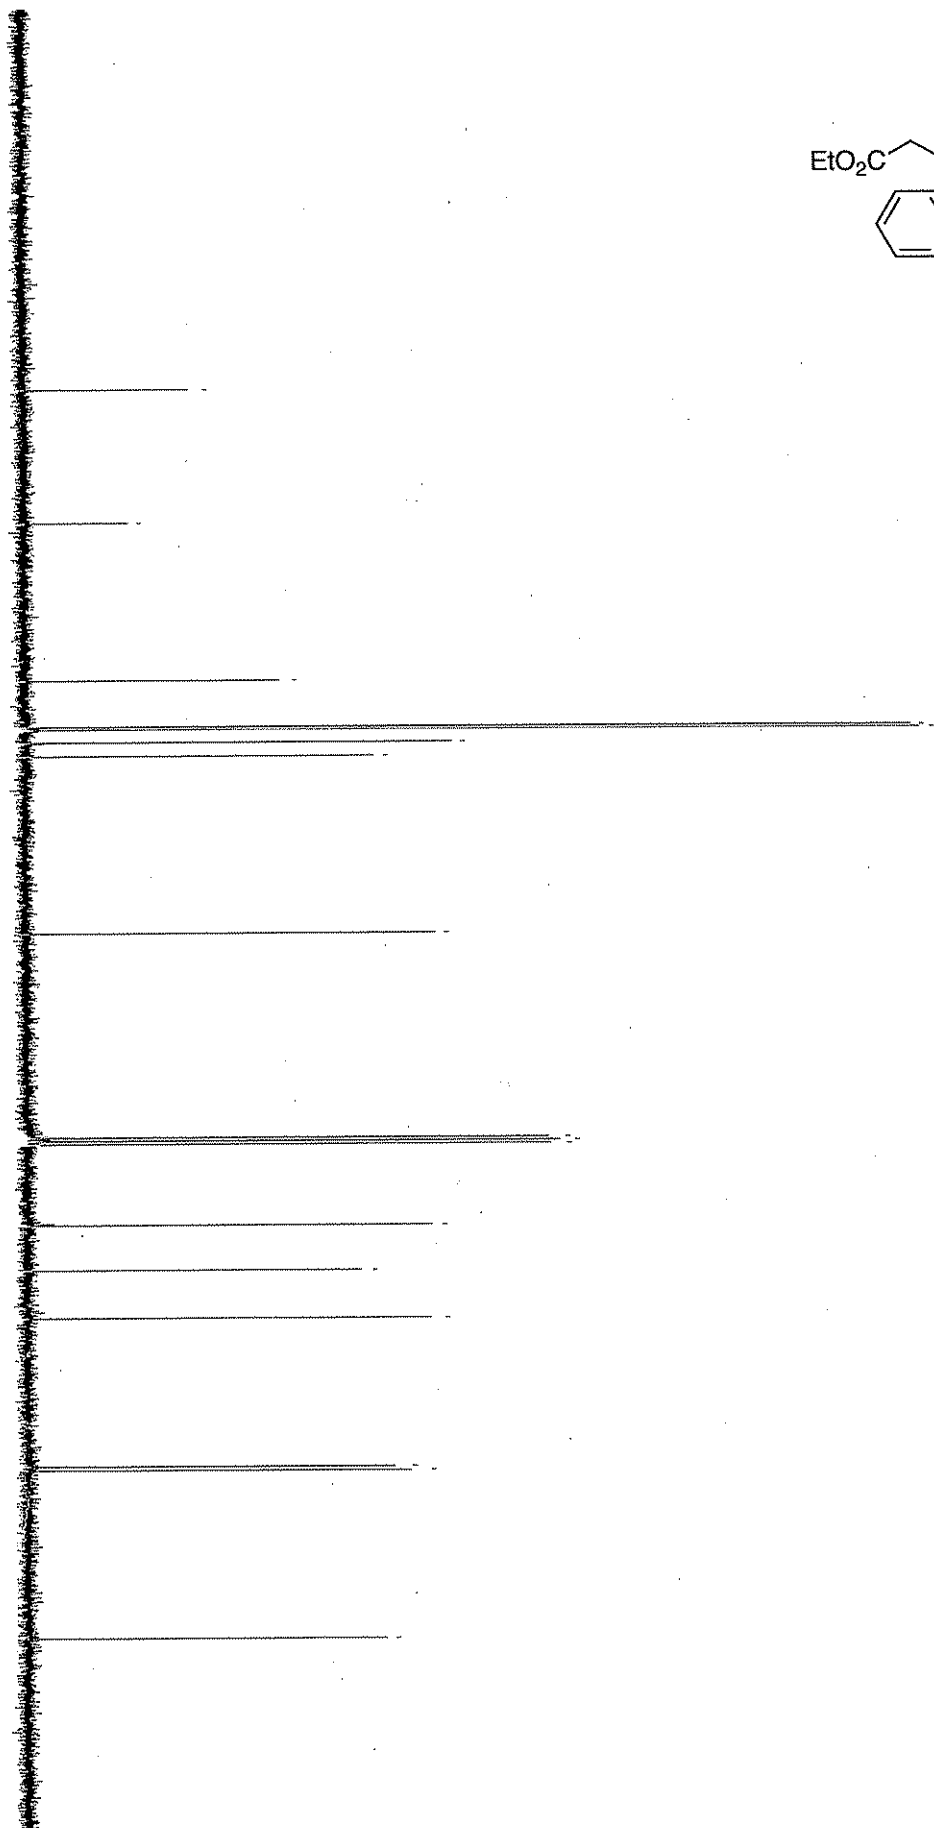

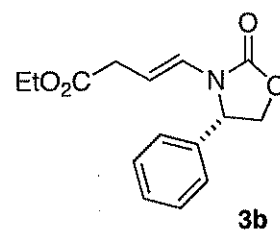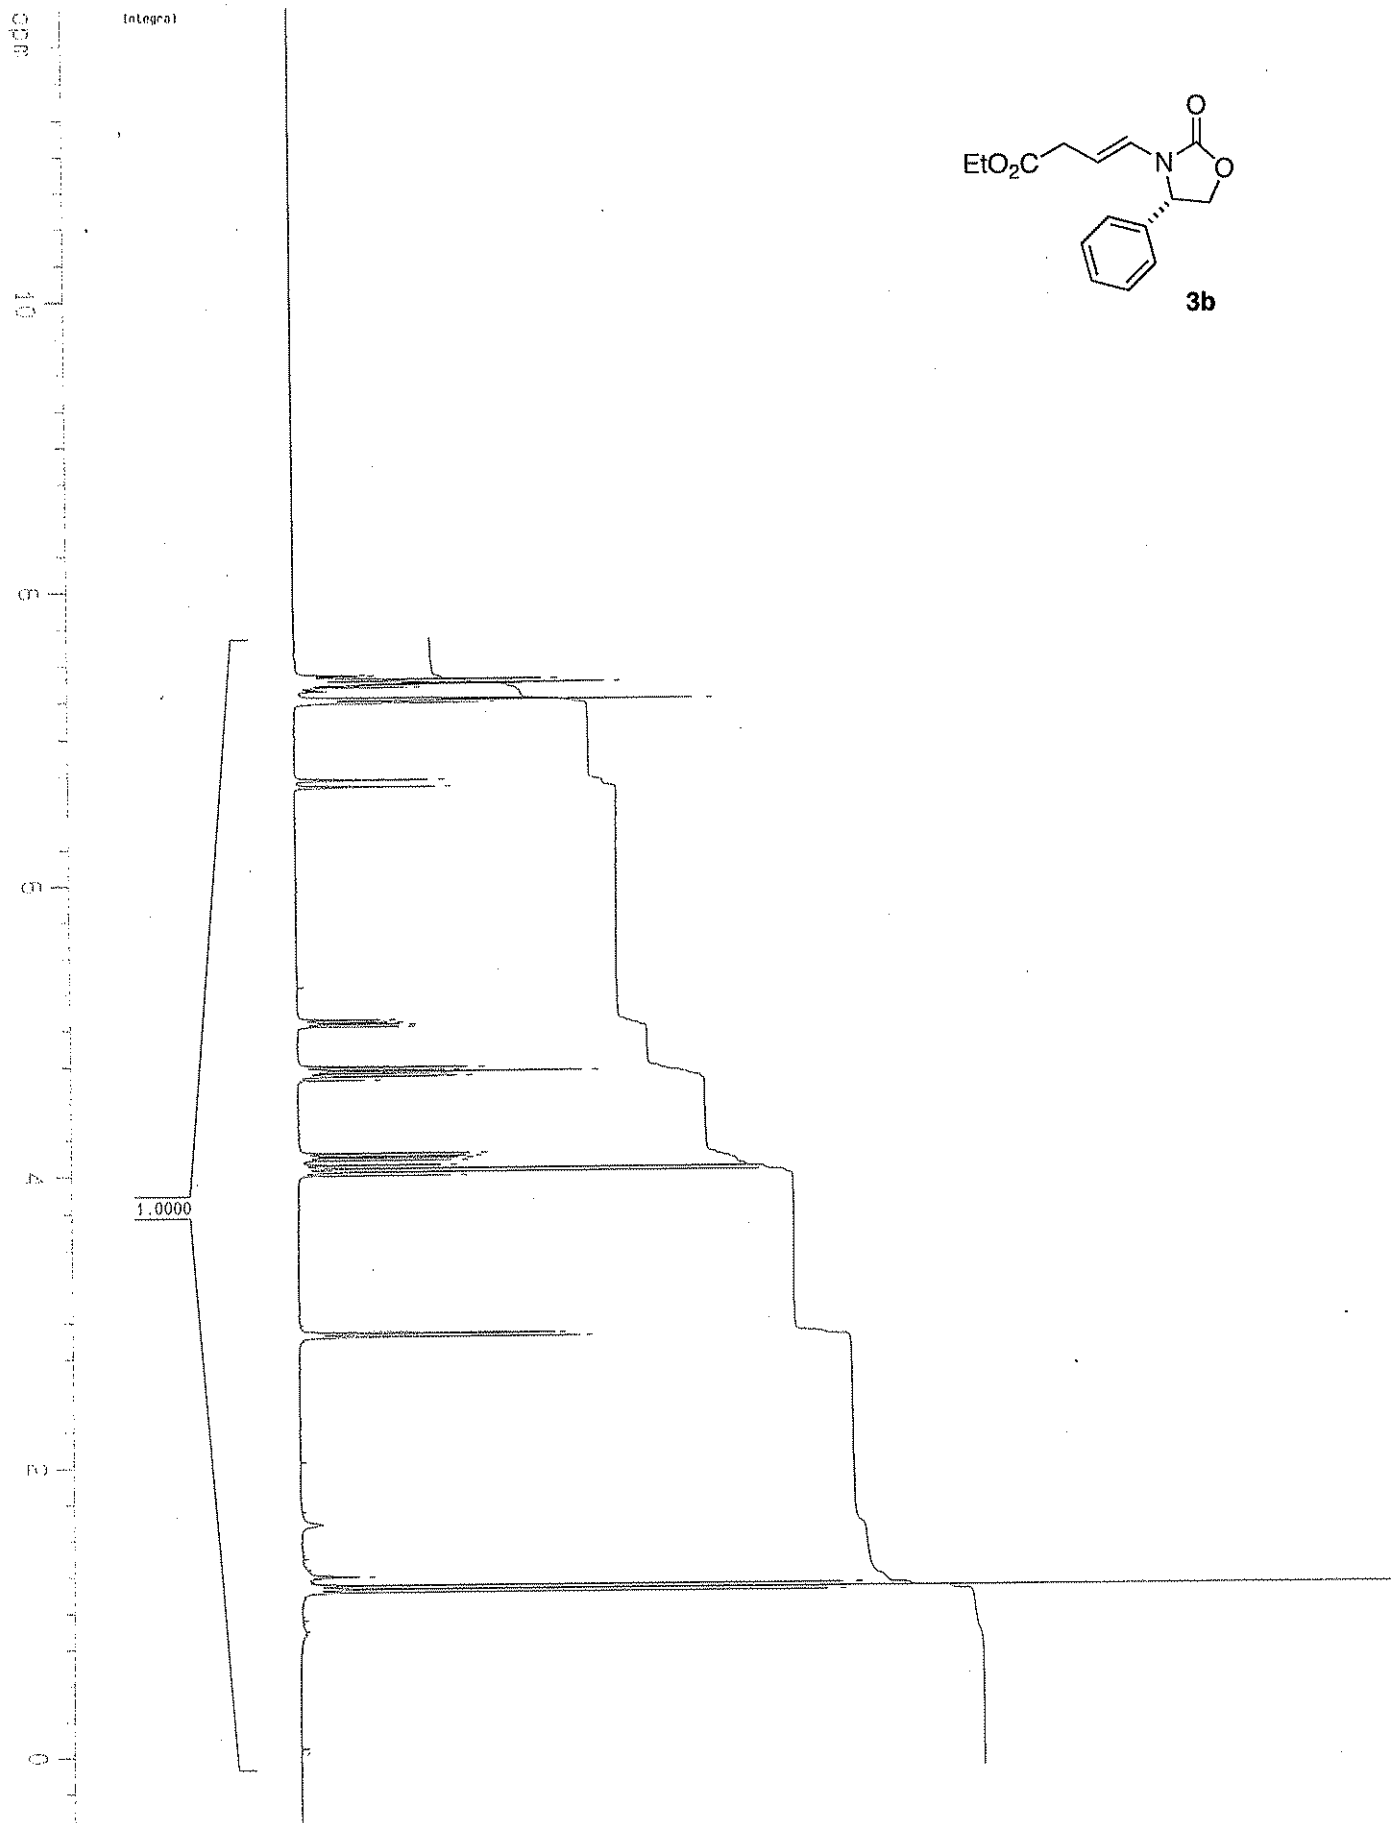

ppm

200

150

100

50

0

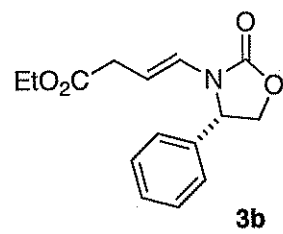

ppm

8

7

6

5

4

3

2

1

Integral

21.664

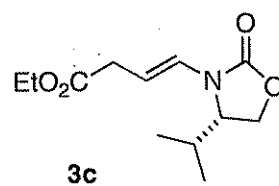



180  
160  
140  
120  
100  
80  
60  
40  
20

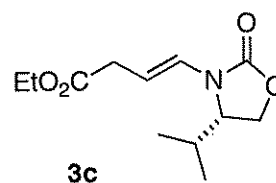

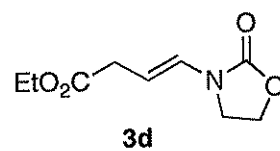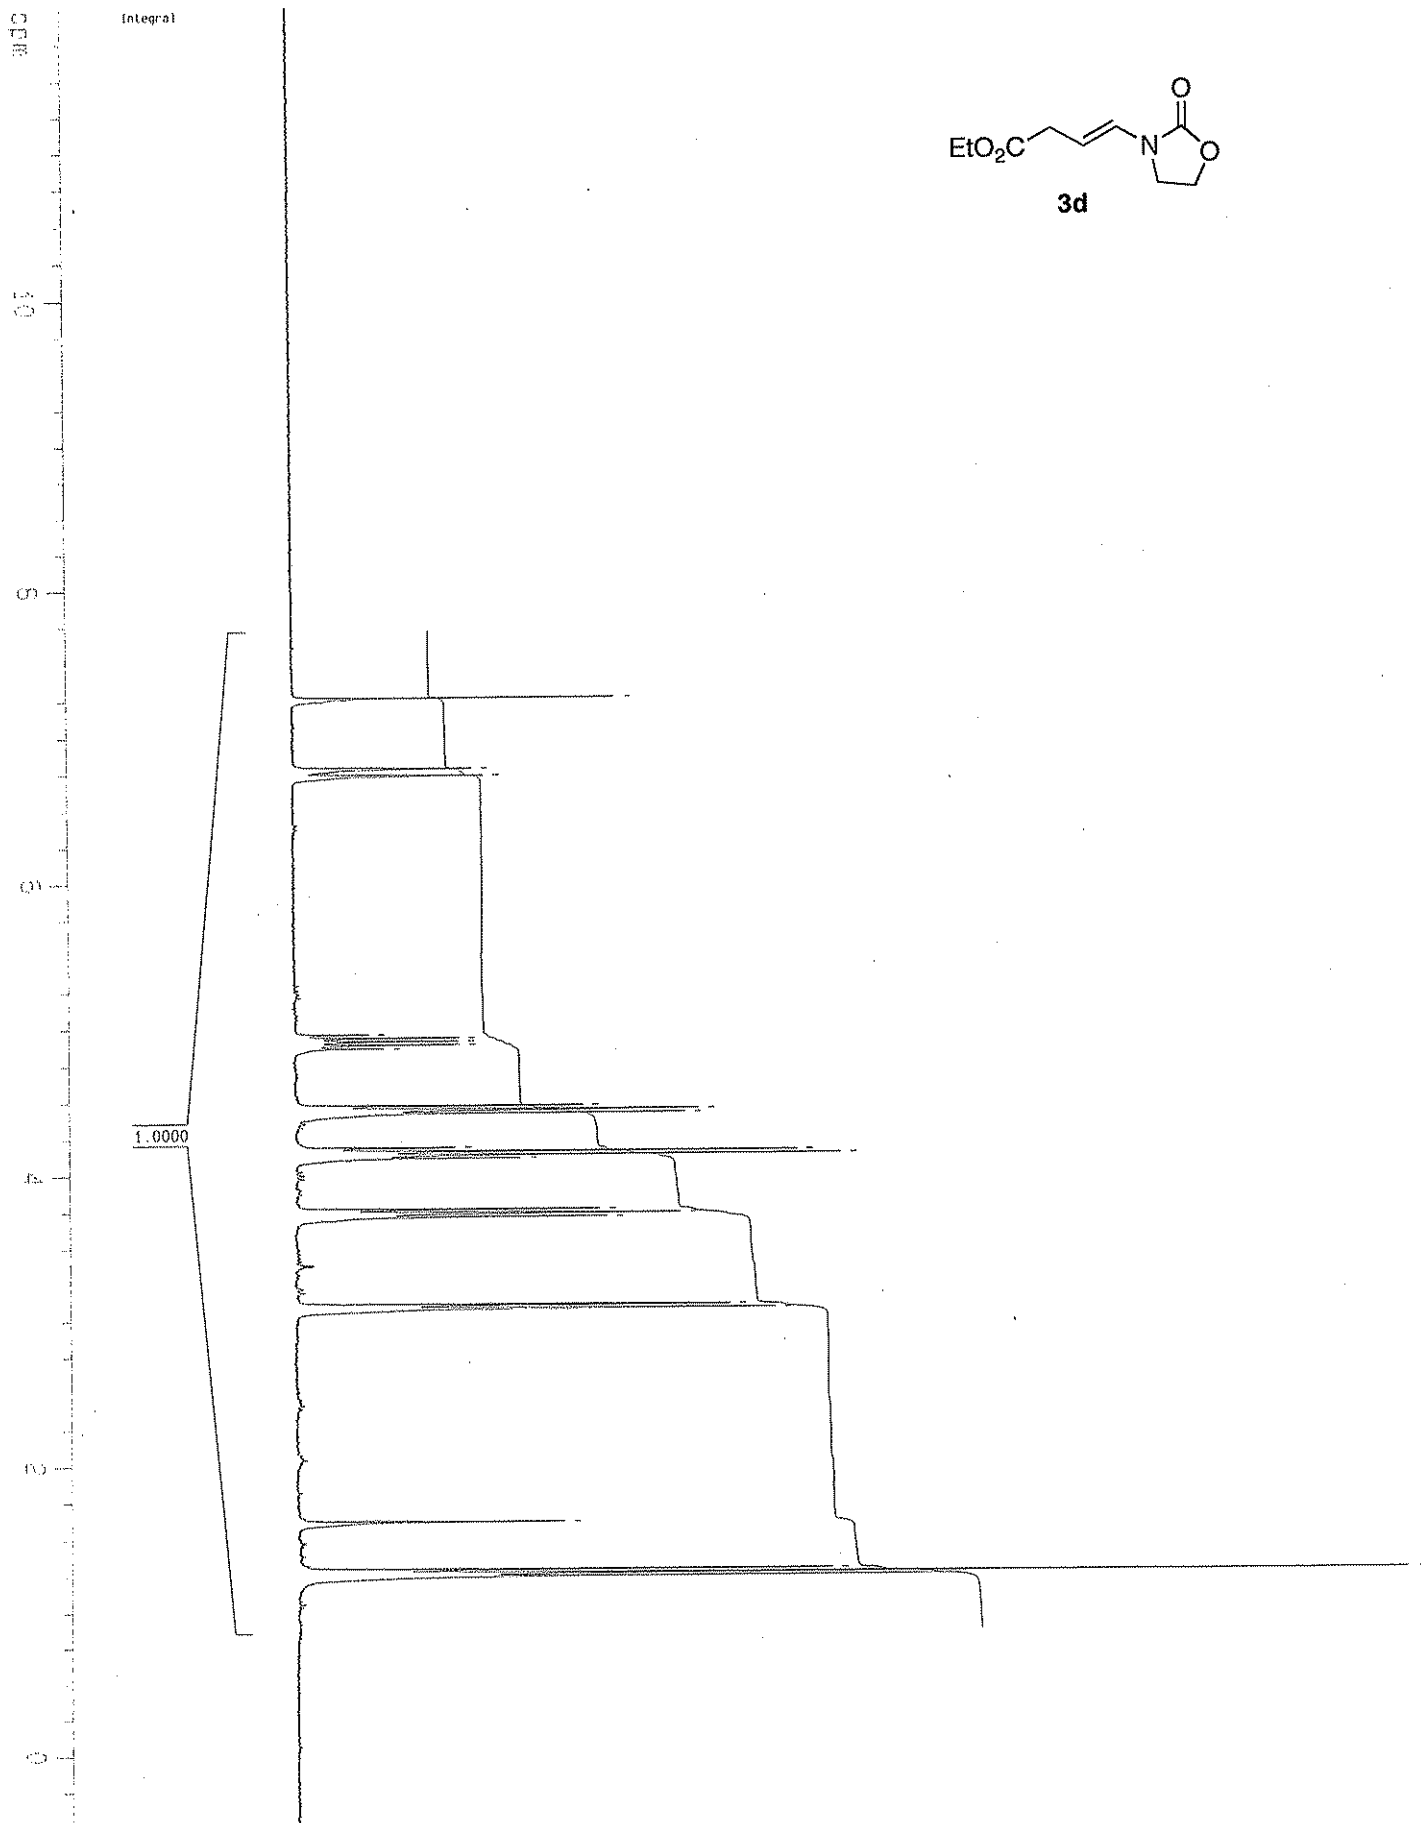

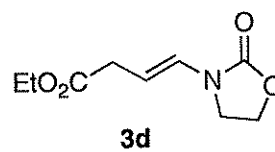

200  
180  
160  
140  
120  
100  
80  
60  
40  
20

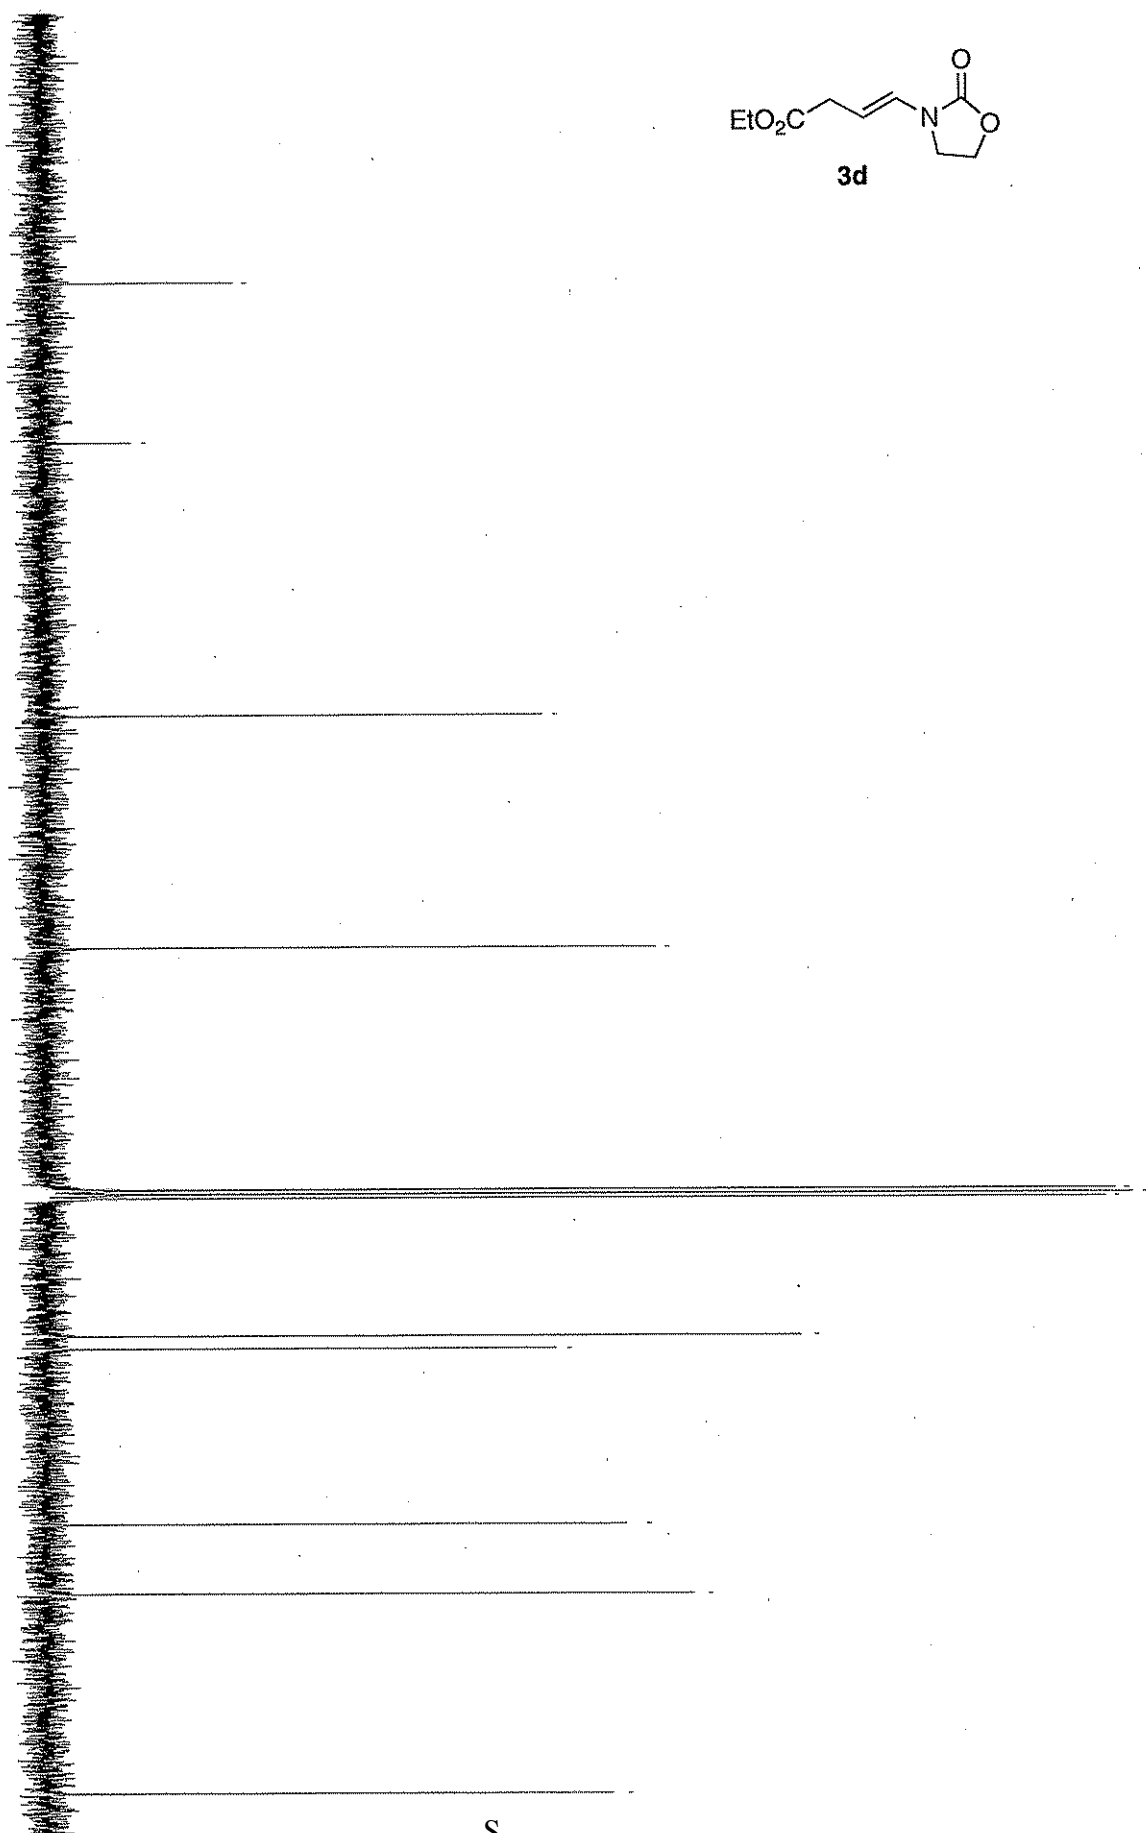

100 90 80 70 60 50 40 30 20 10 0

Integral

1.0000

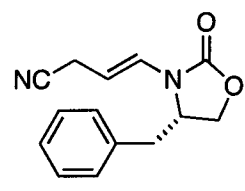

3e

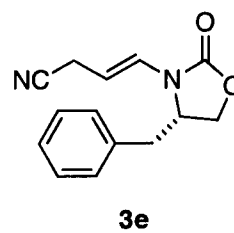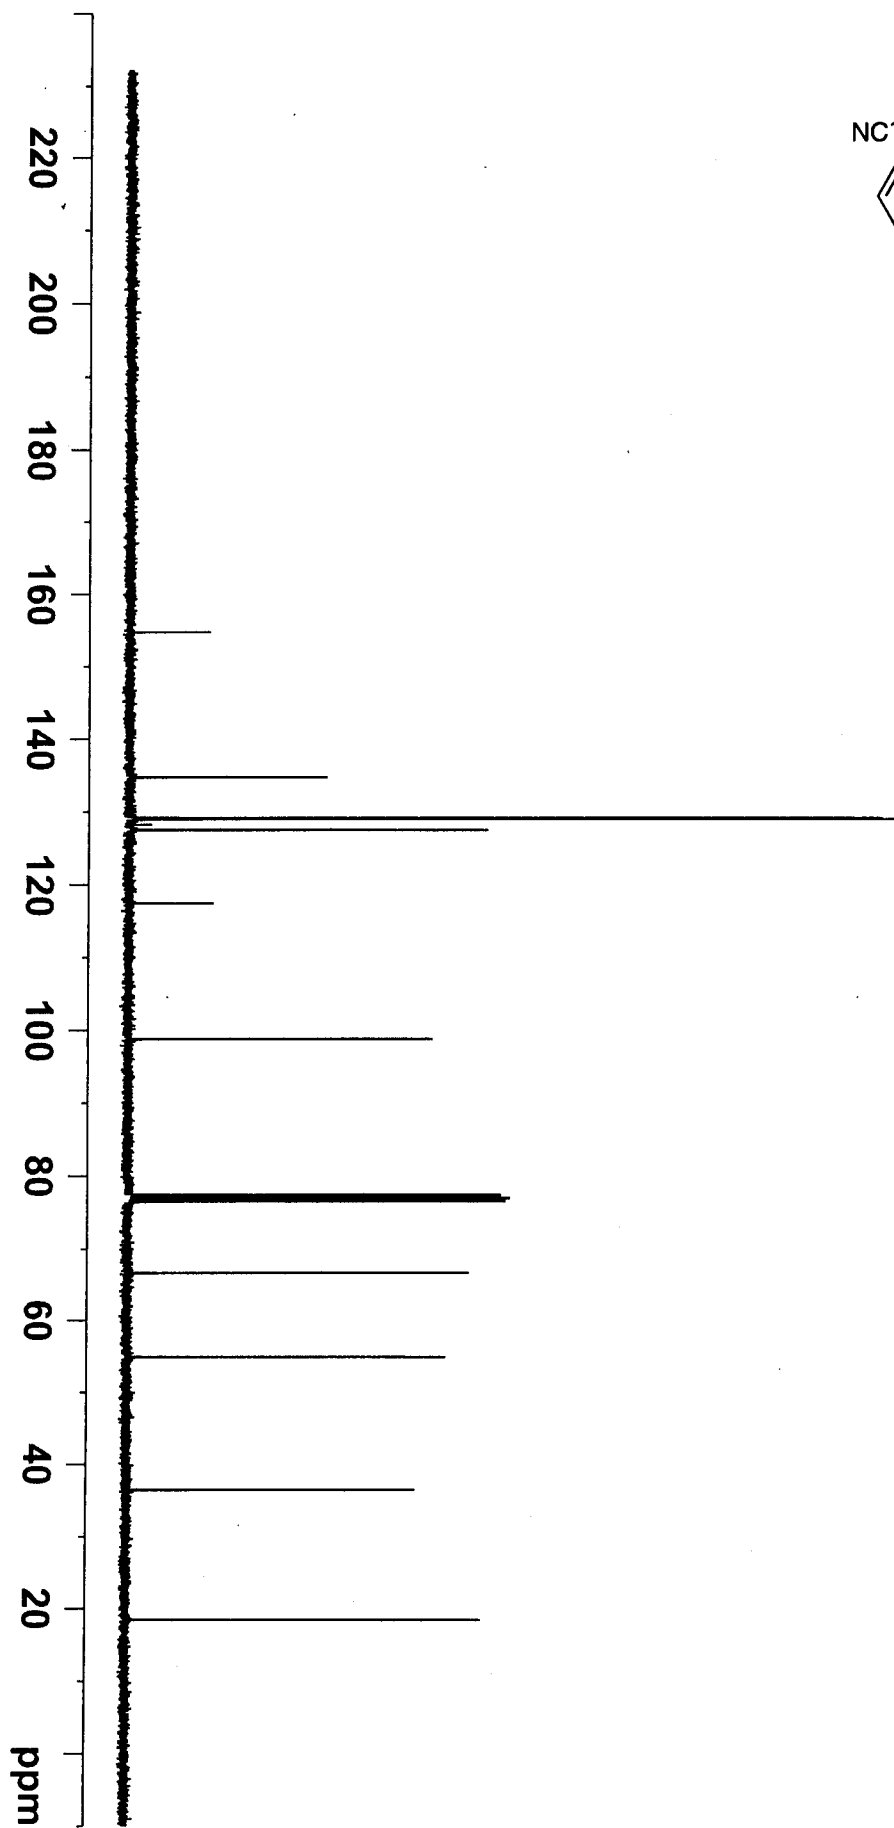

1000 10 6 4 2 0

Integral

1.0002

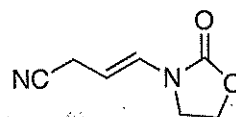

3f

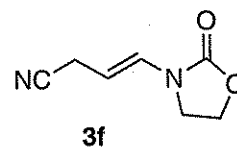

ppm

200

150

100

50

0

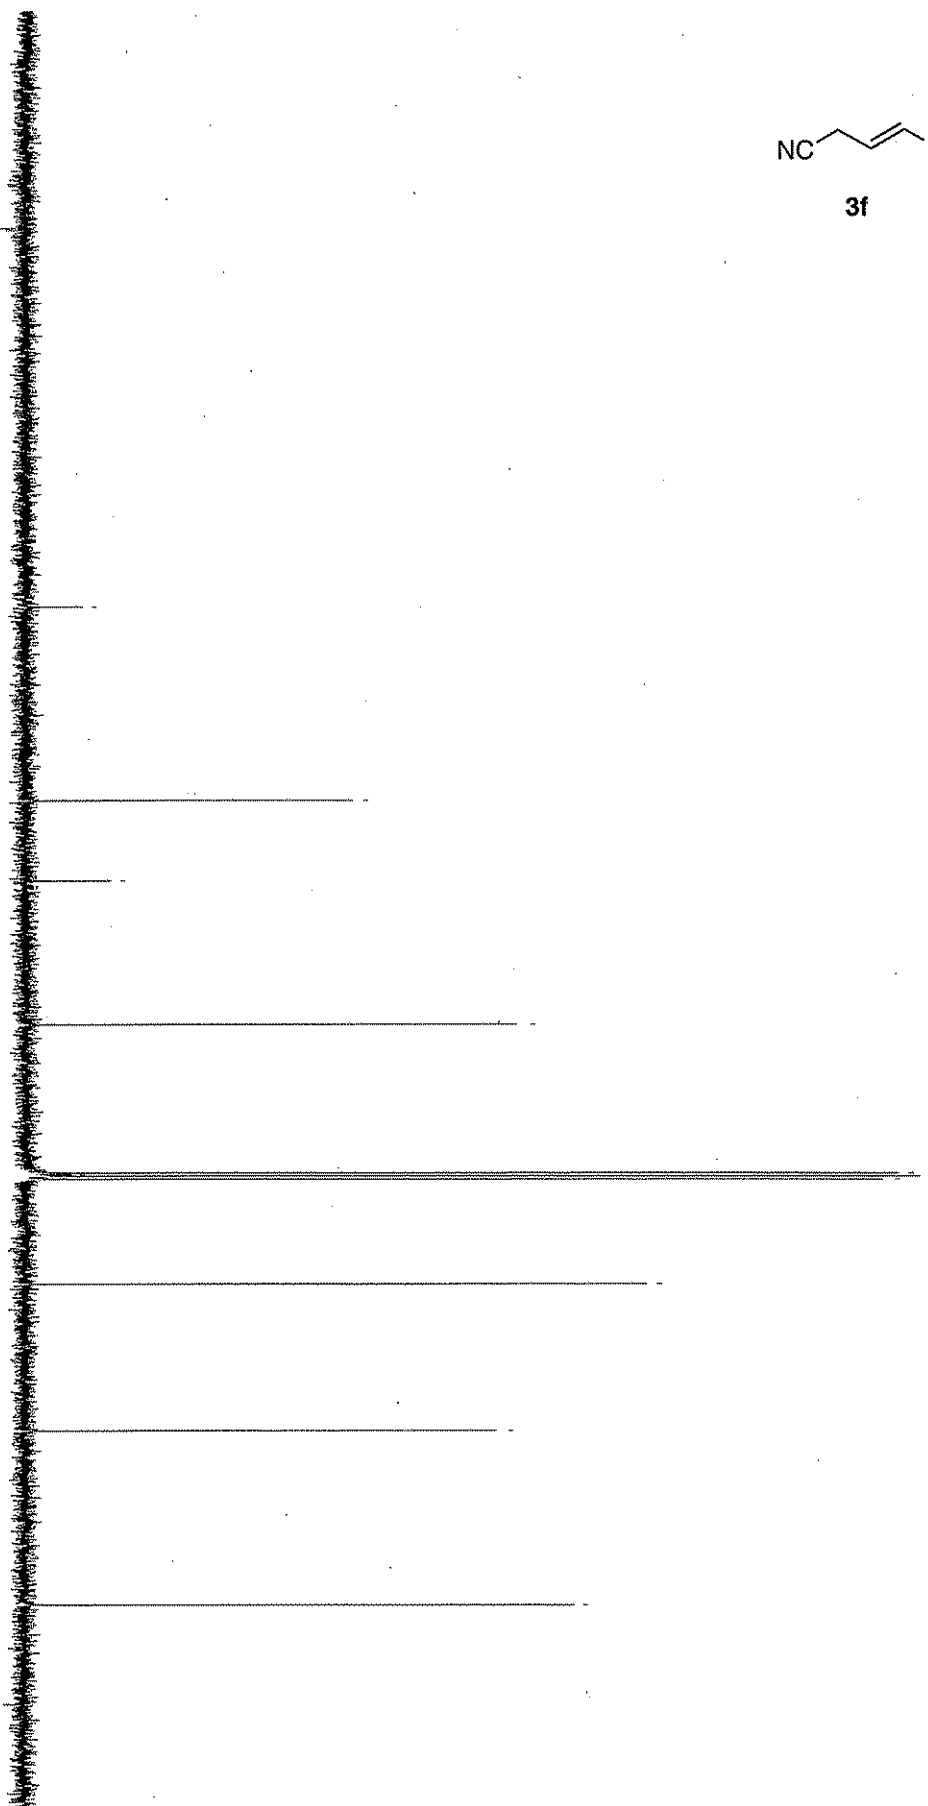

ppm

10

5

0

4

2

0

Integral

1.0000

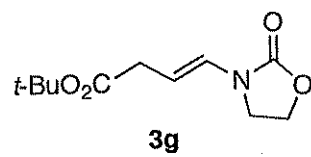



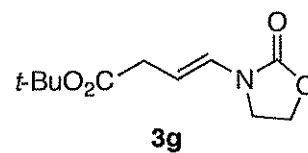

ppm

200

150

100

50

0

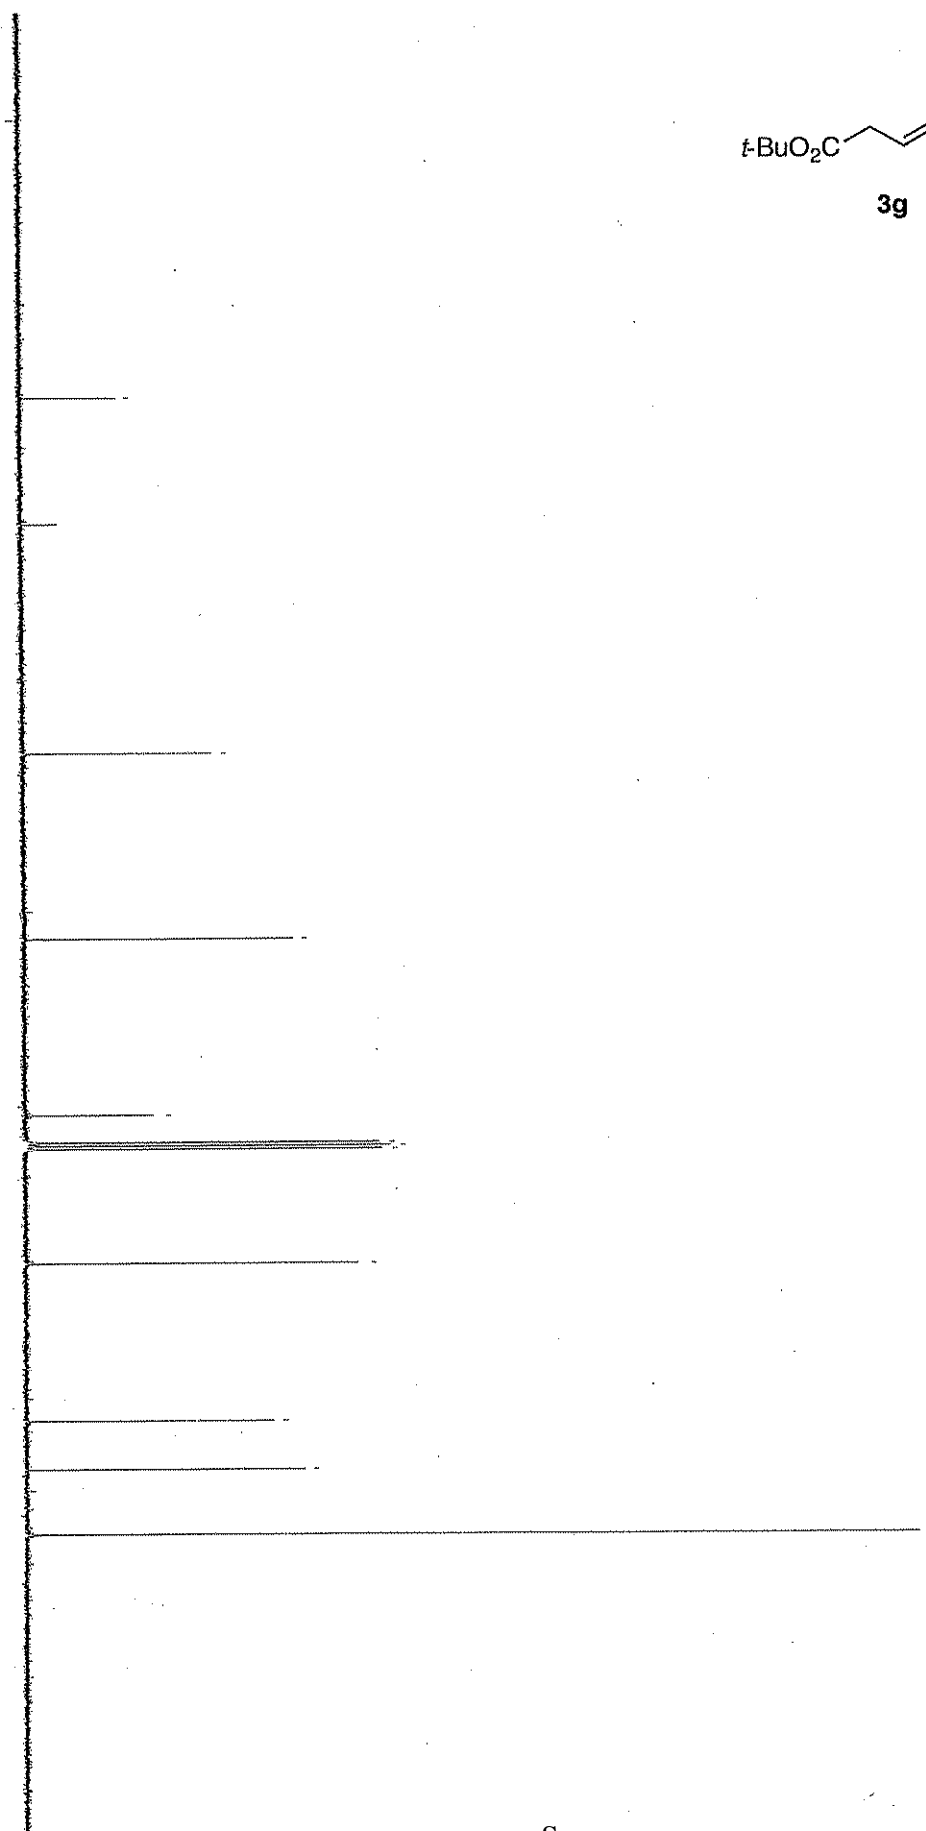

ppm

10

8

6

4

2

0

Integral

1.0000

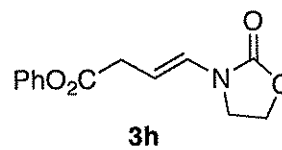

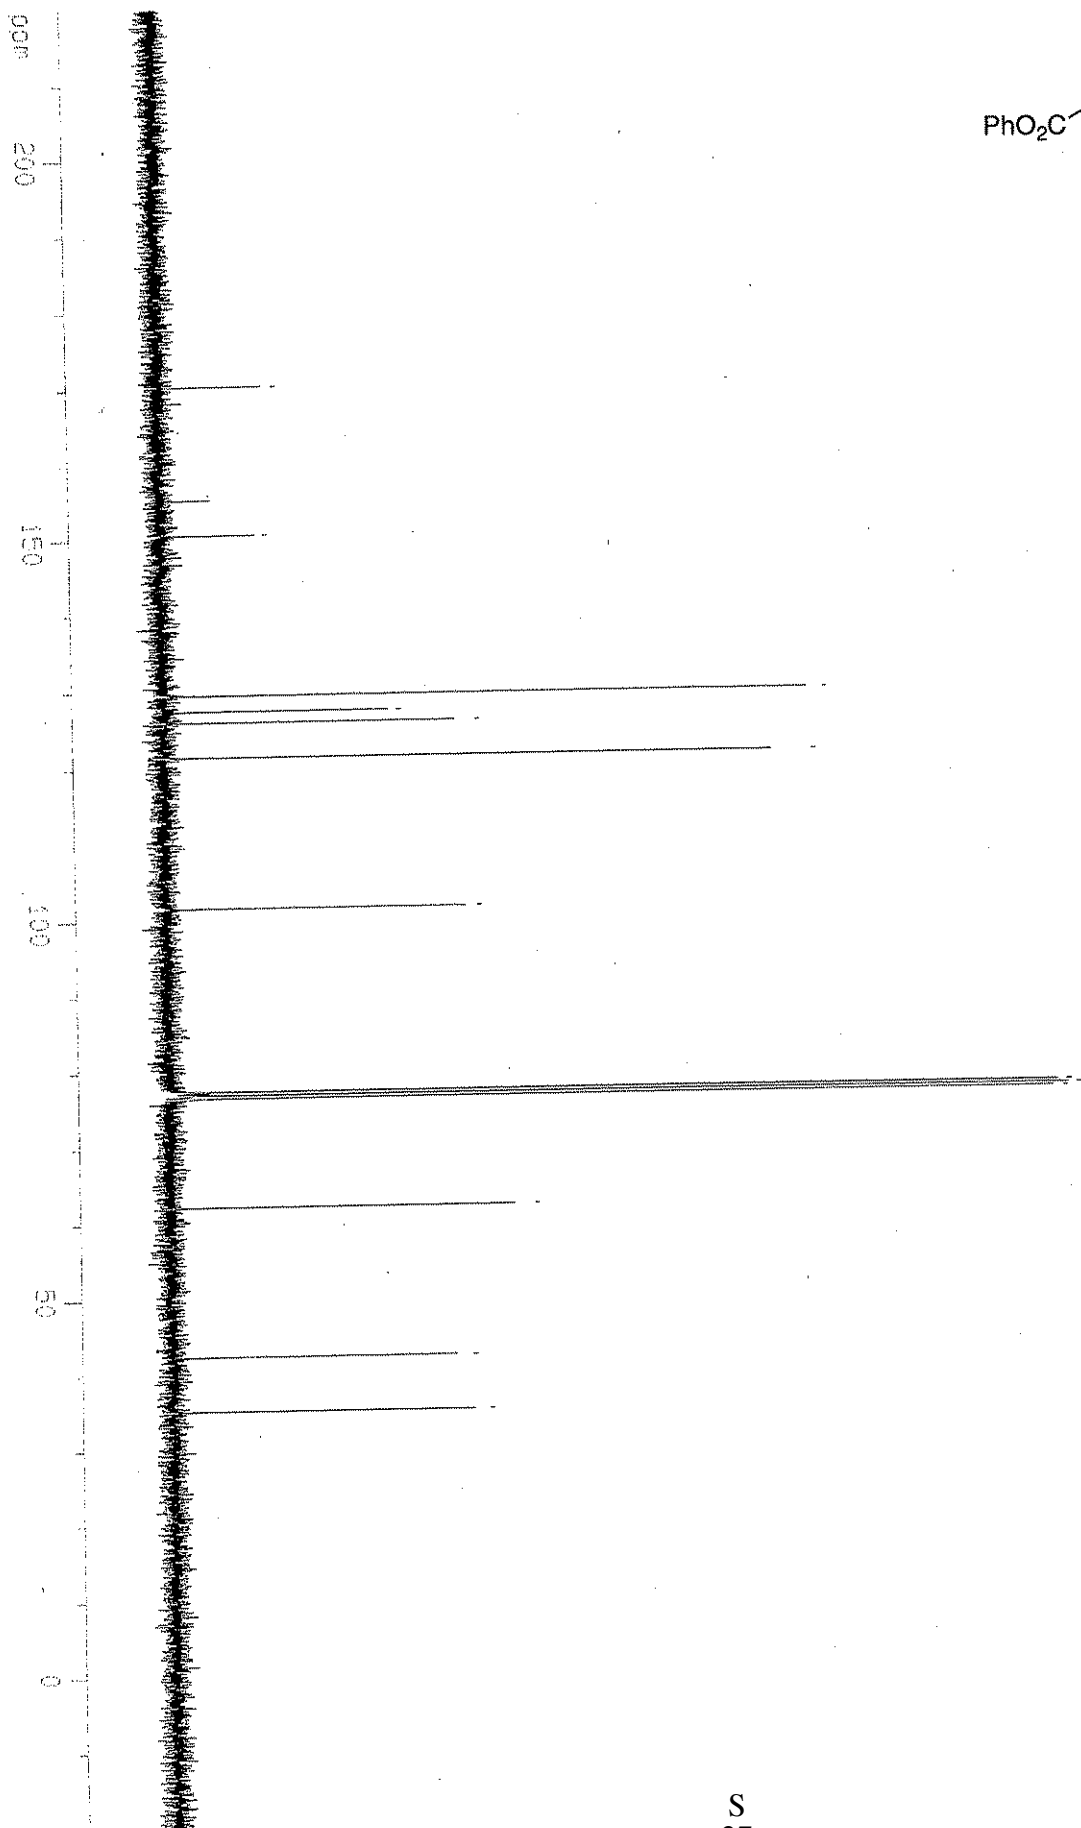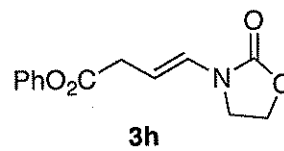

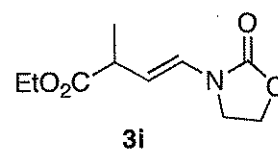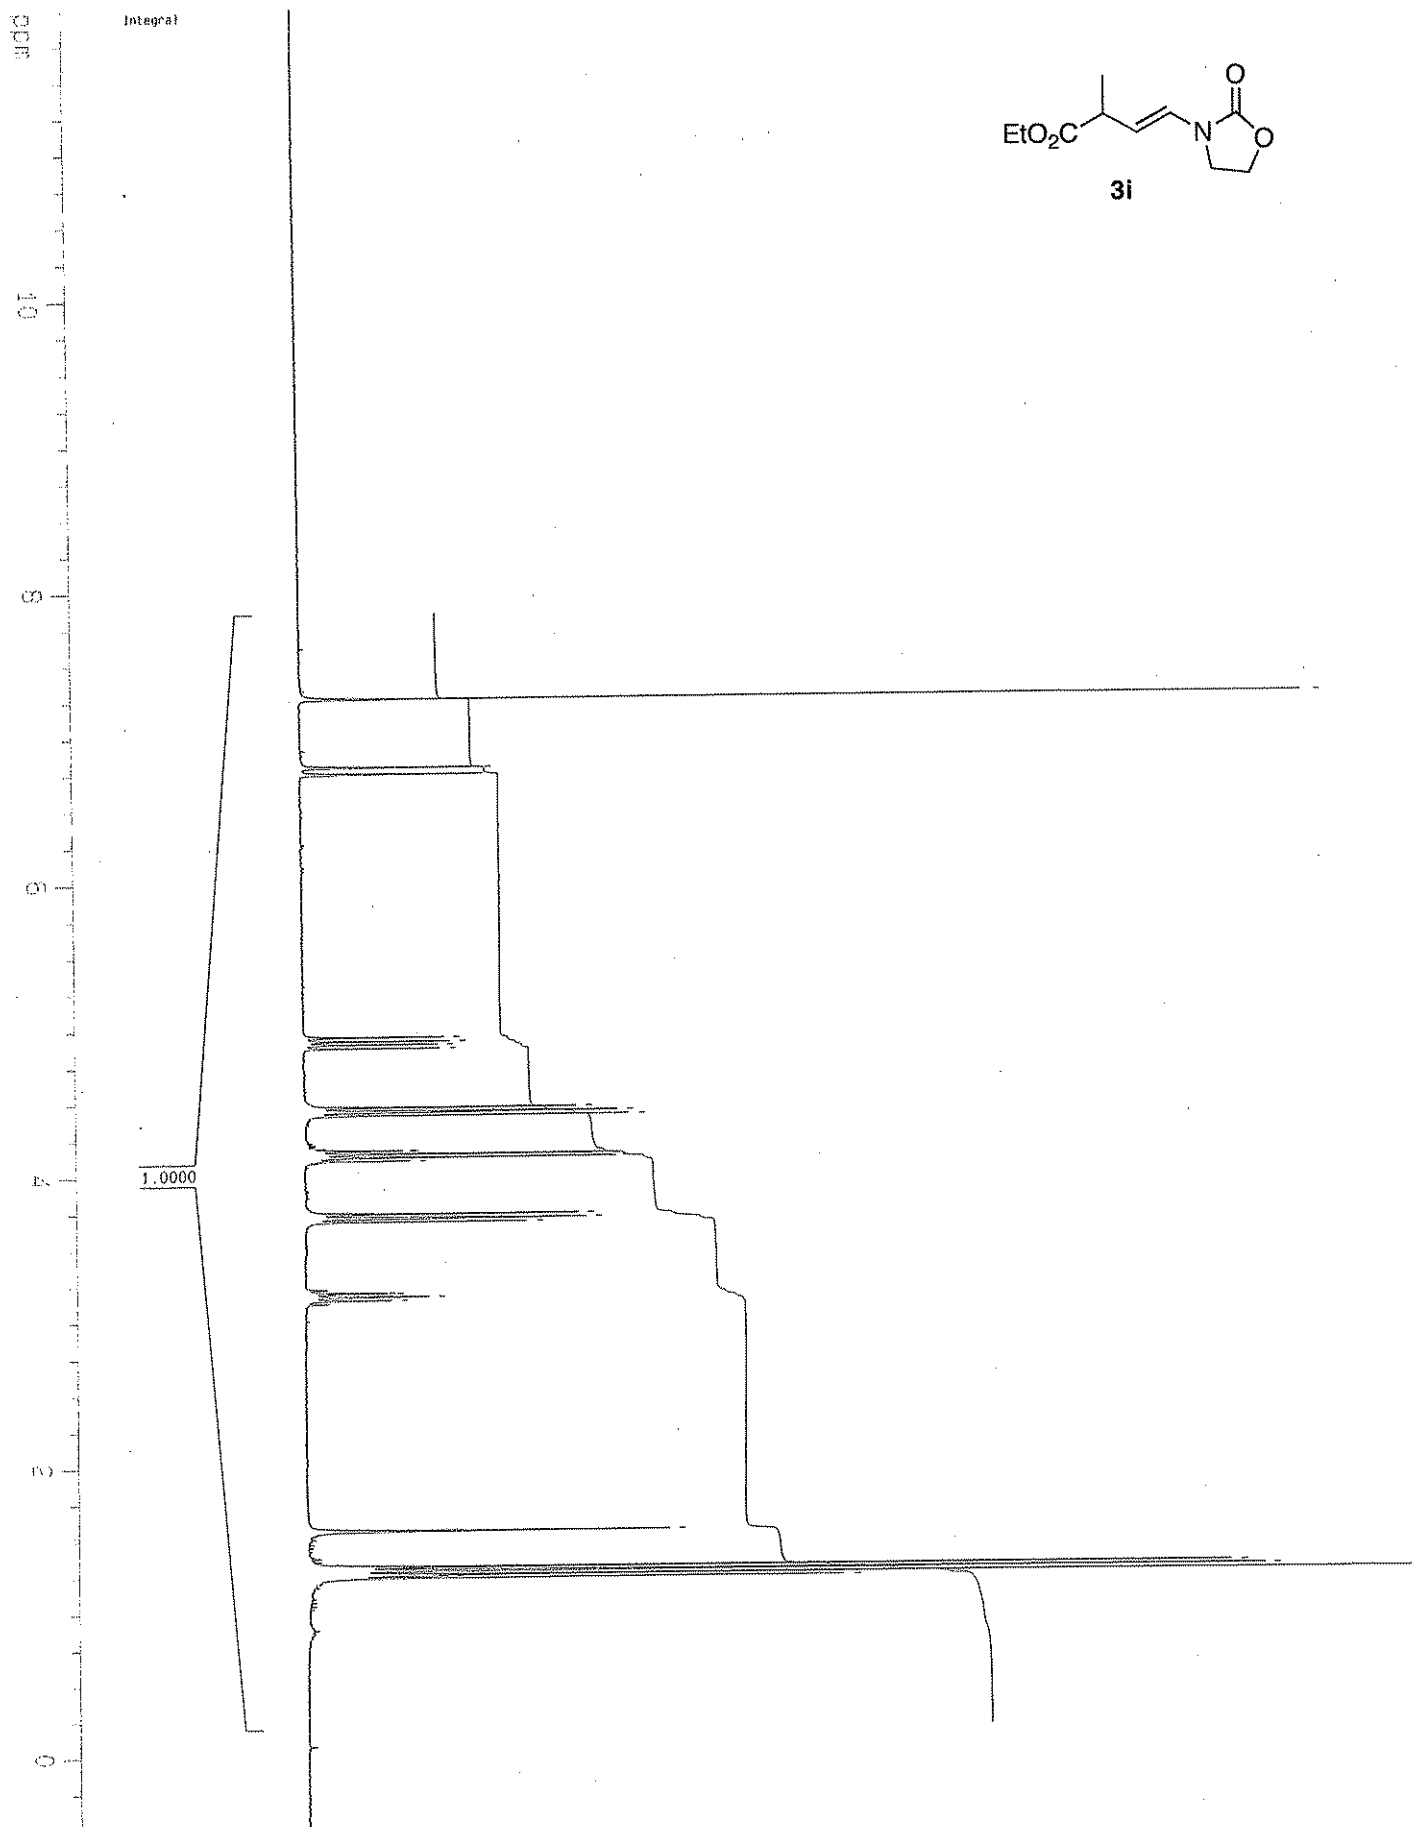

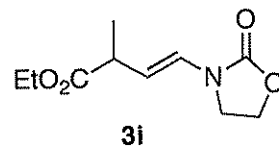

ppm

200

150

100

50

0

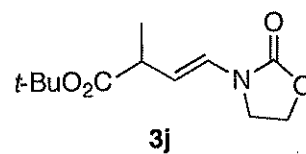

ppm

7

6

5

4

3

2

1

Integral

24.616

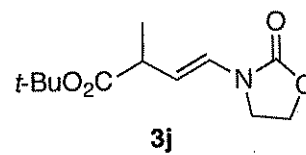

ppm

200

150

100

50

0

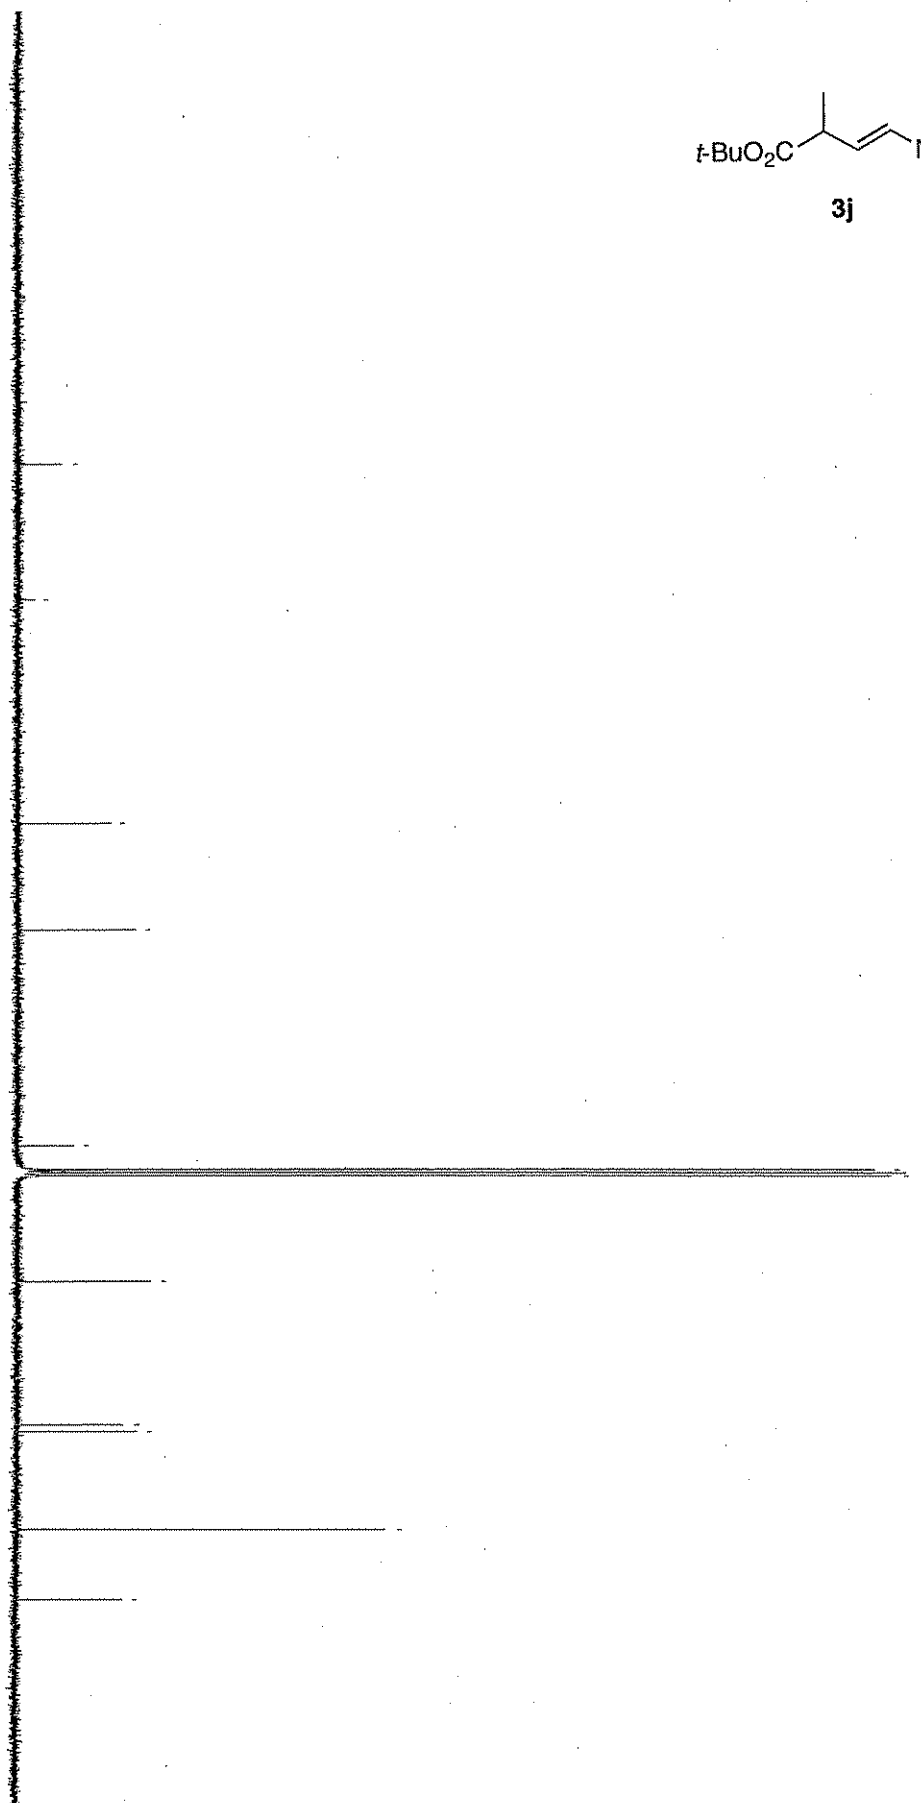

S

31

100  
10  
8  
6  
4  
2  
0

Integral

1.0002

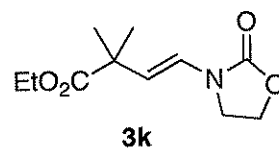



ppm

200

150

100

50

0

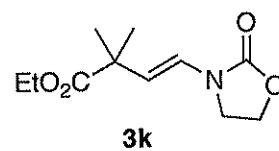

ppm

Integral

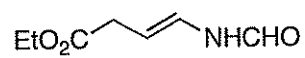

(E)-3I

8

7

6

5

1.0008

4

3

2

1

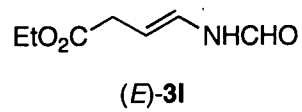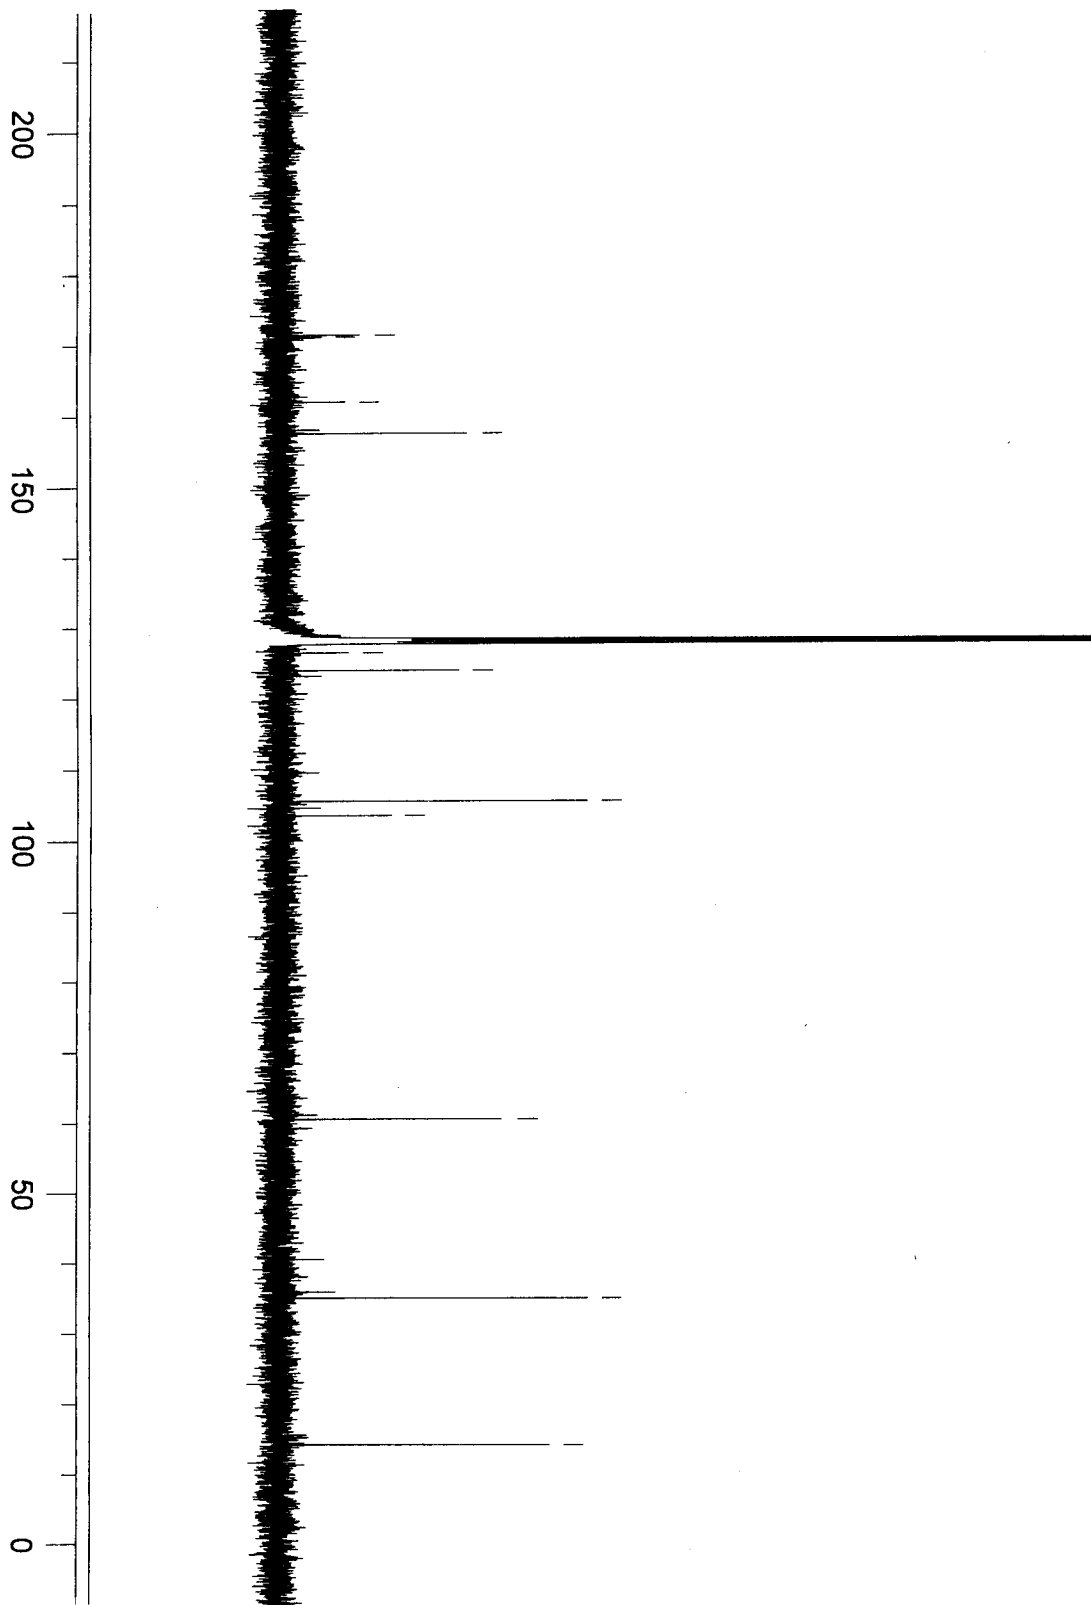

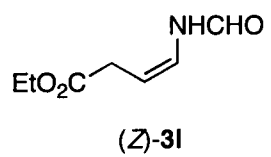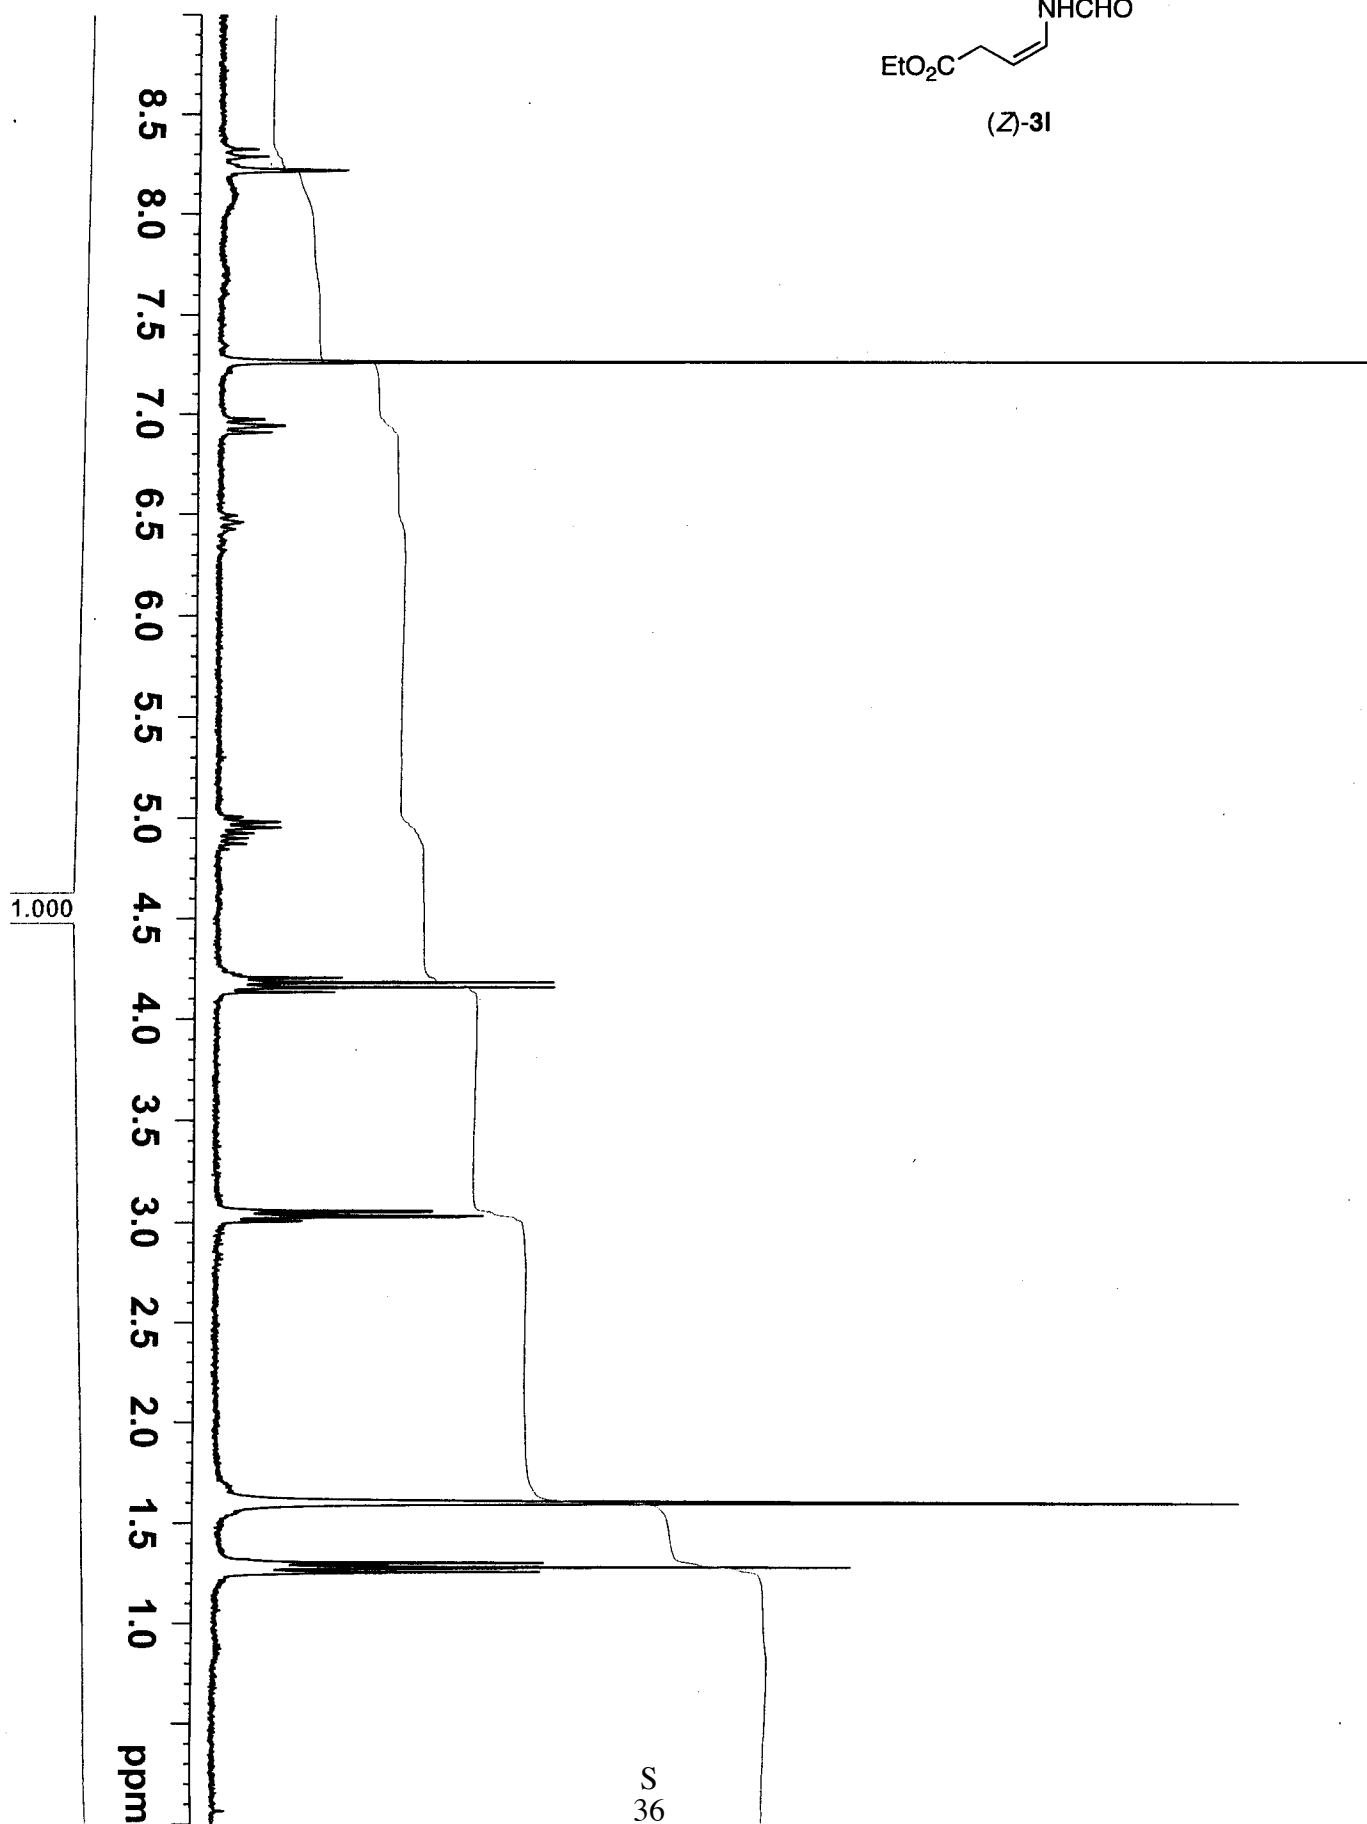

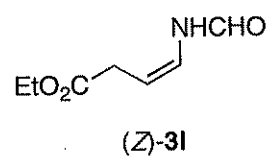

ppm  
 180  
 160  
 140  
 120  
 100  
 80  
 60  
 40  
 20

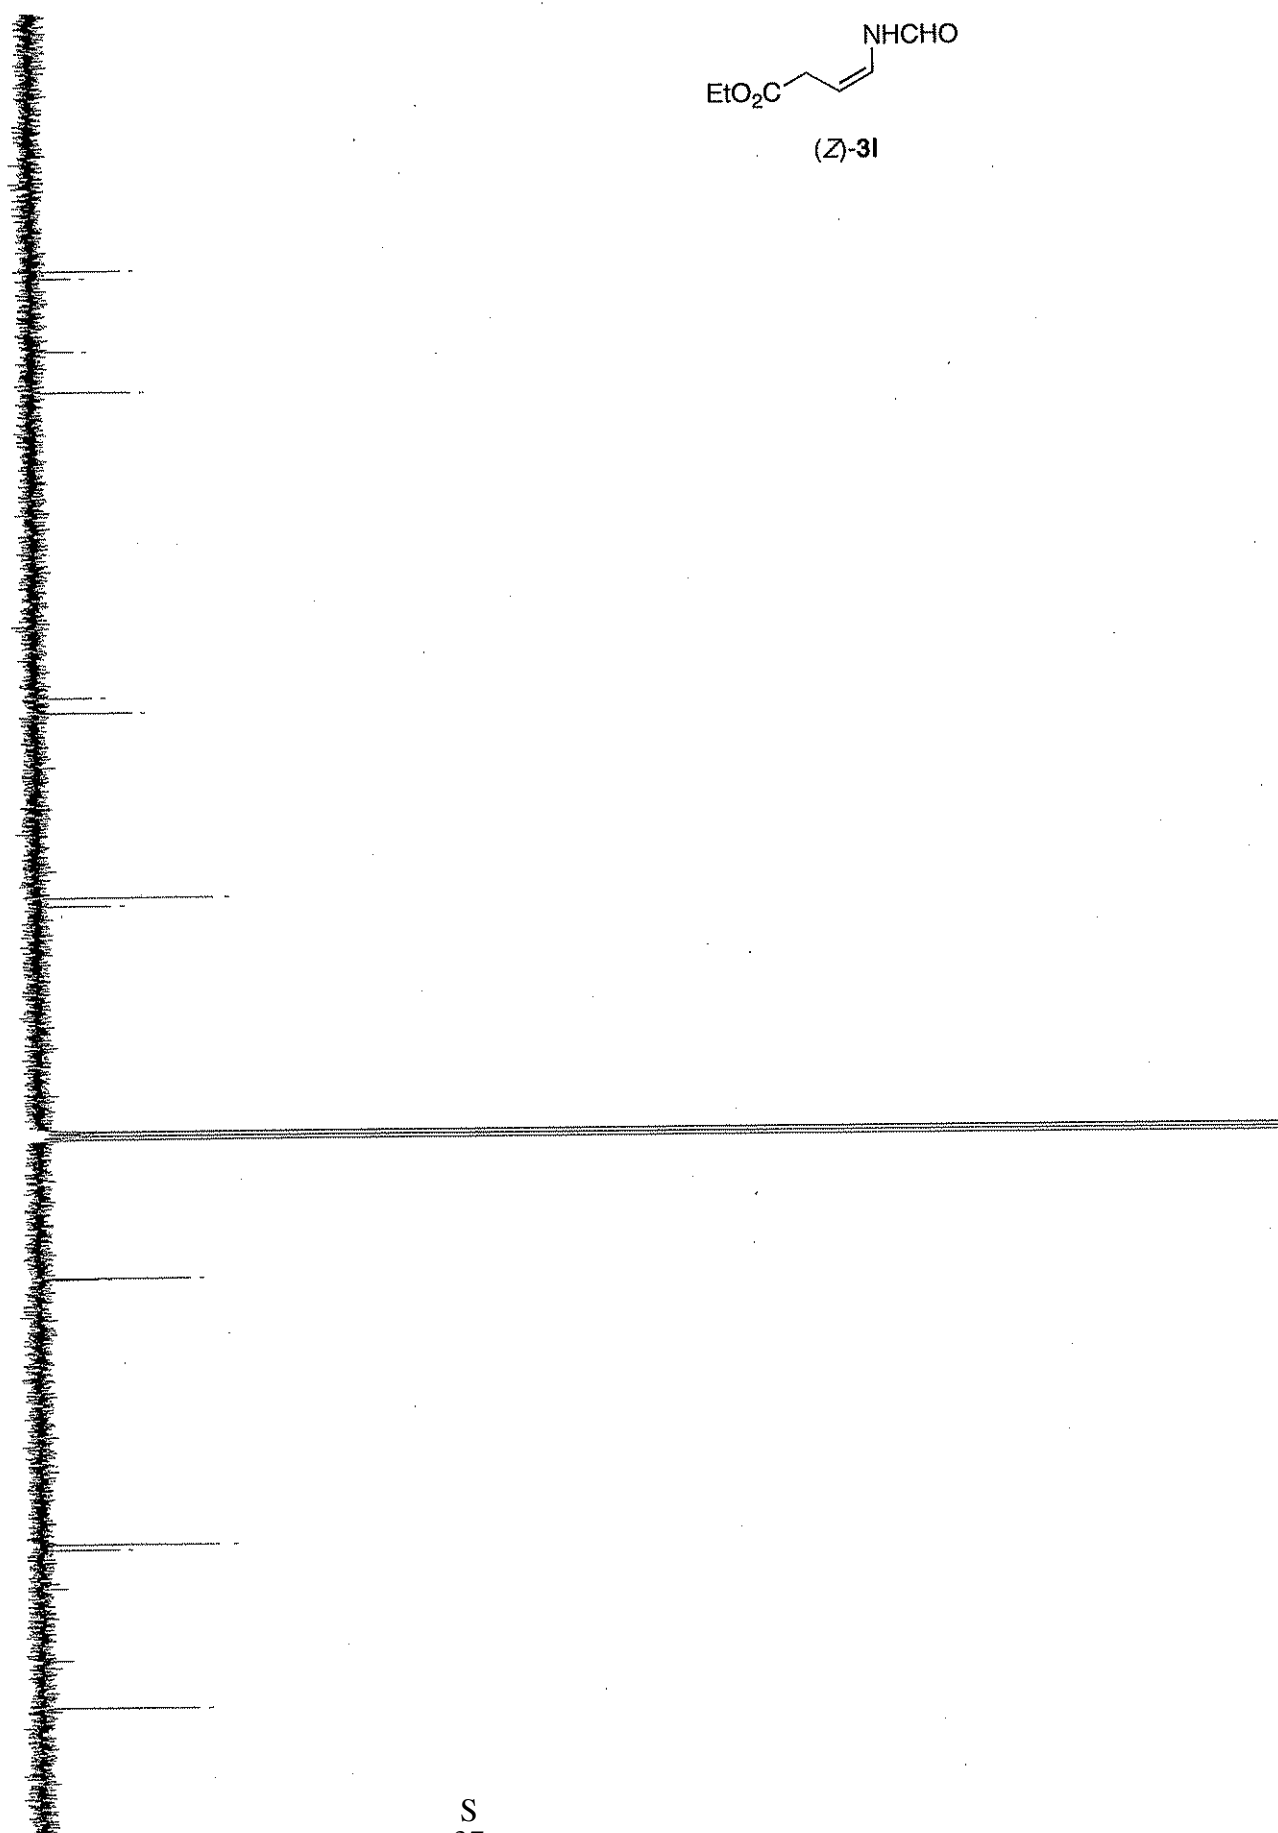

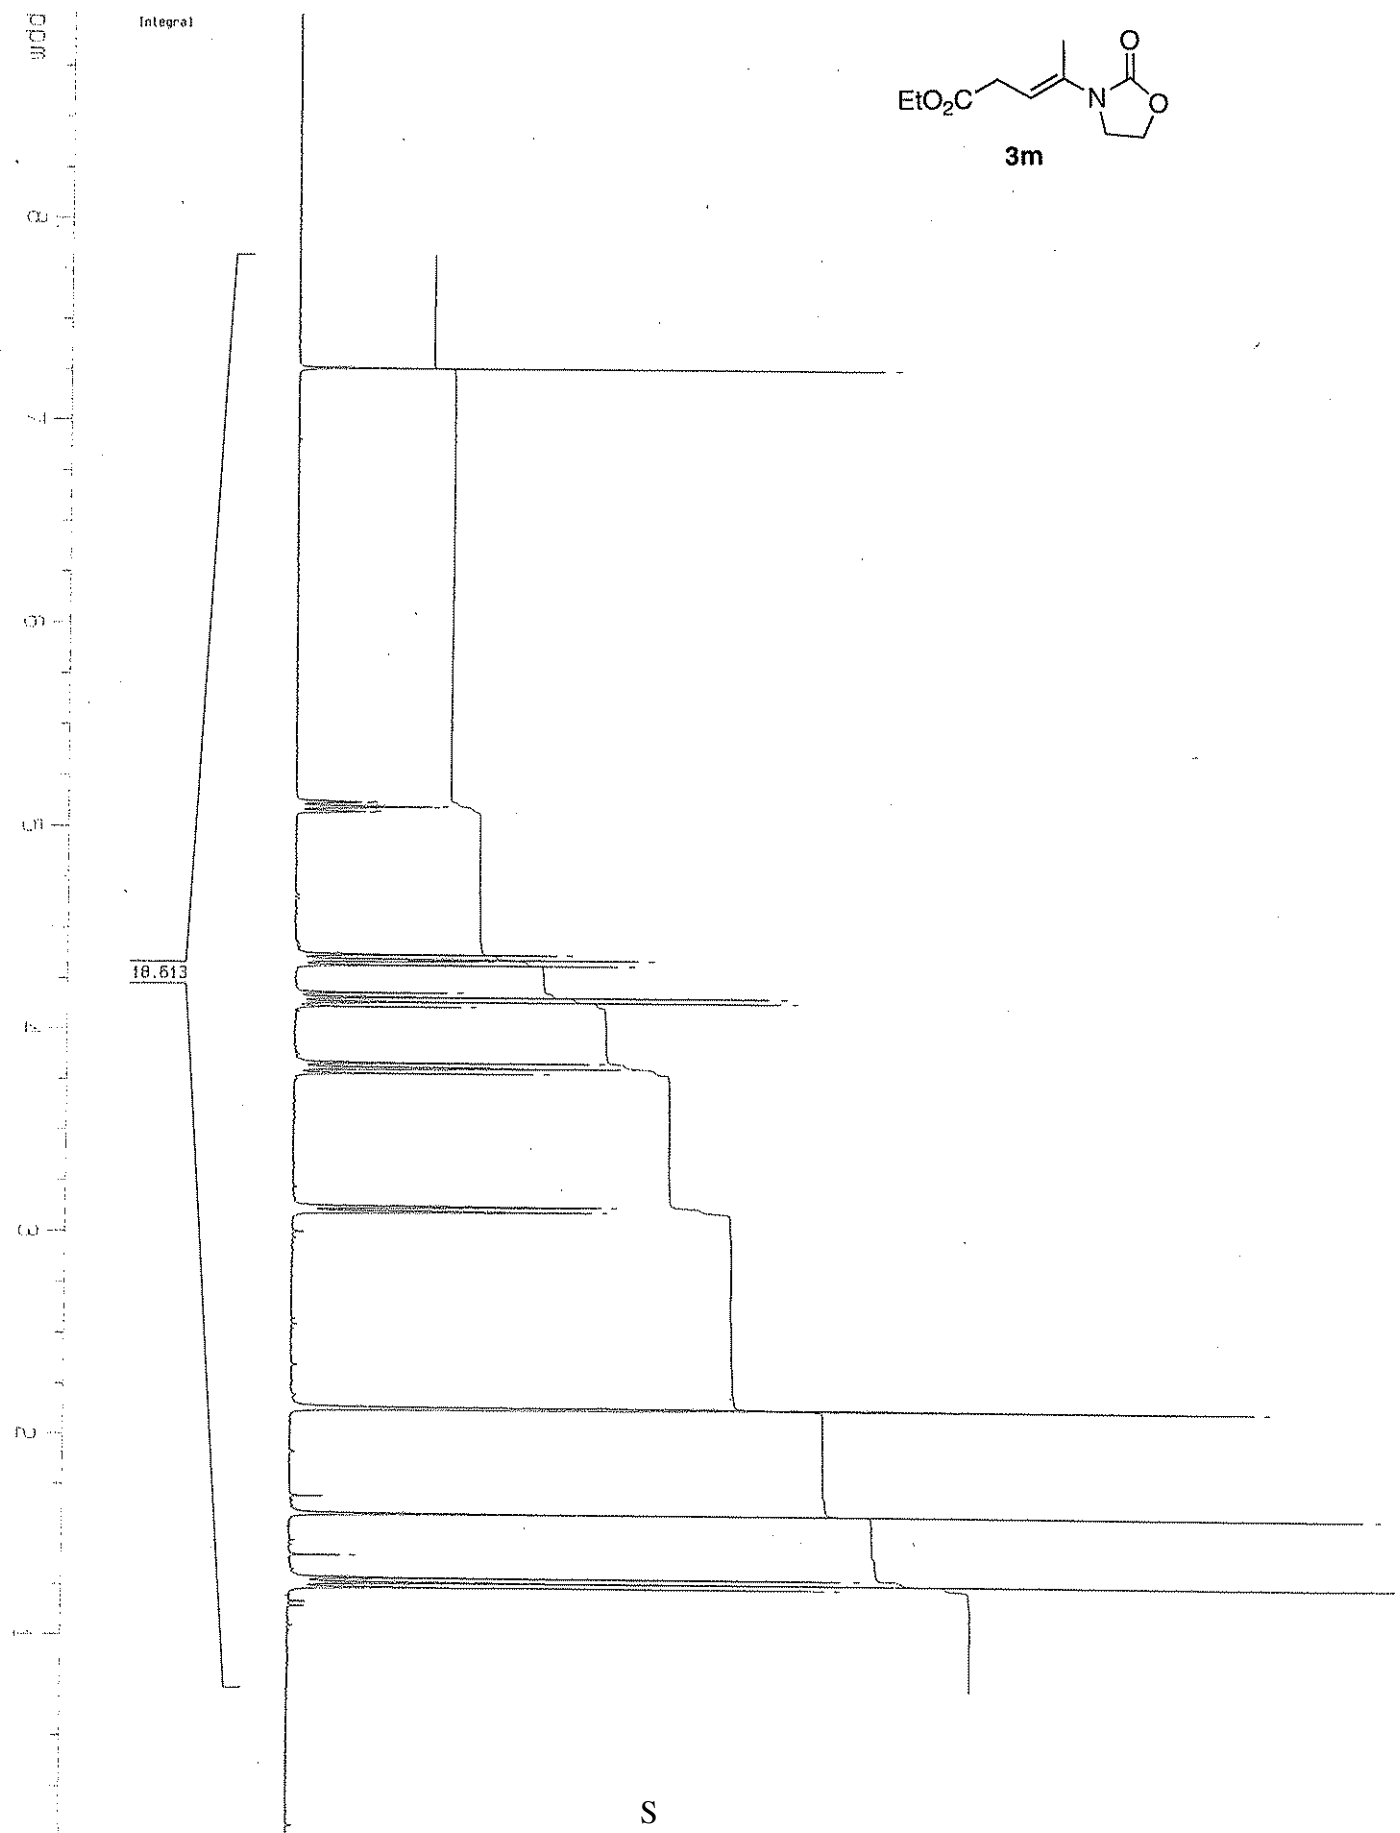

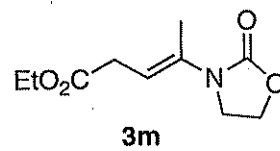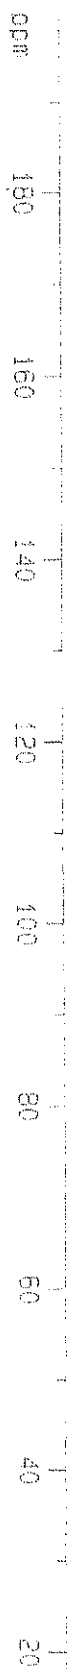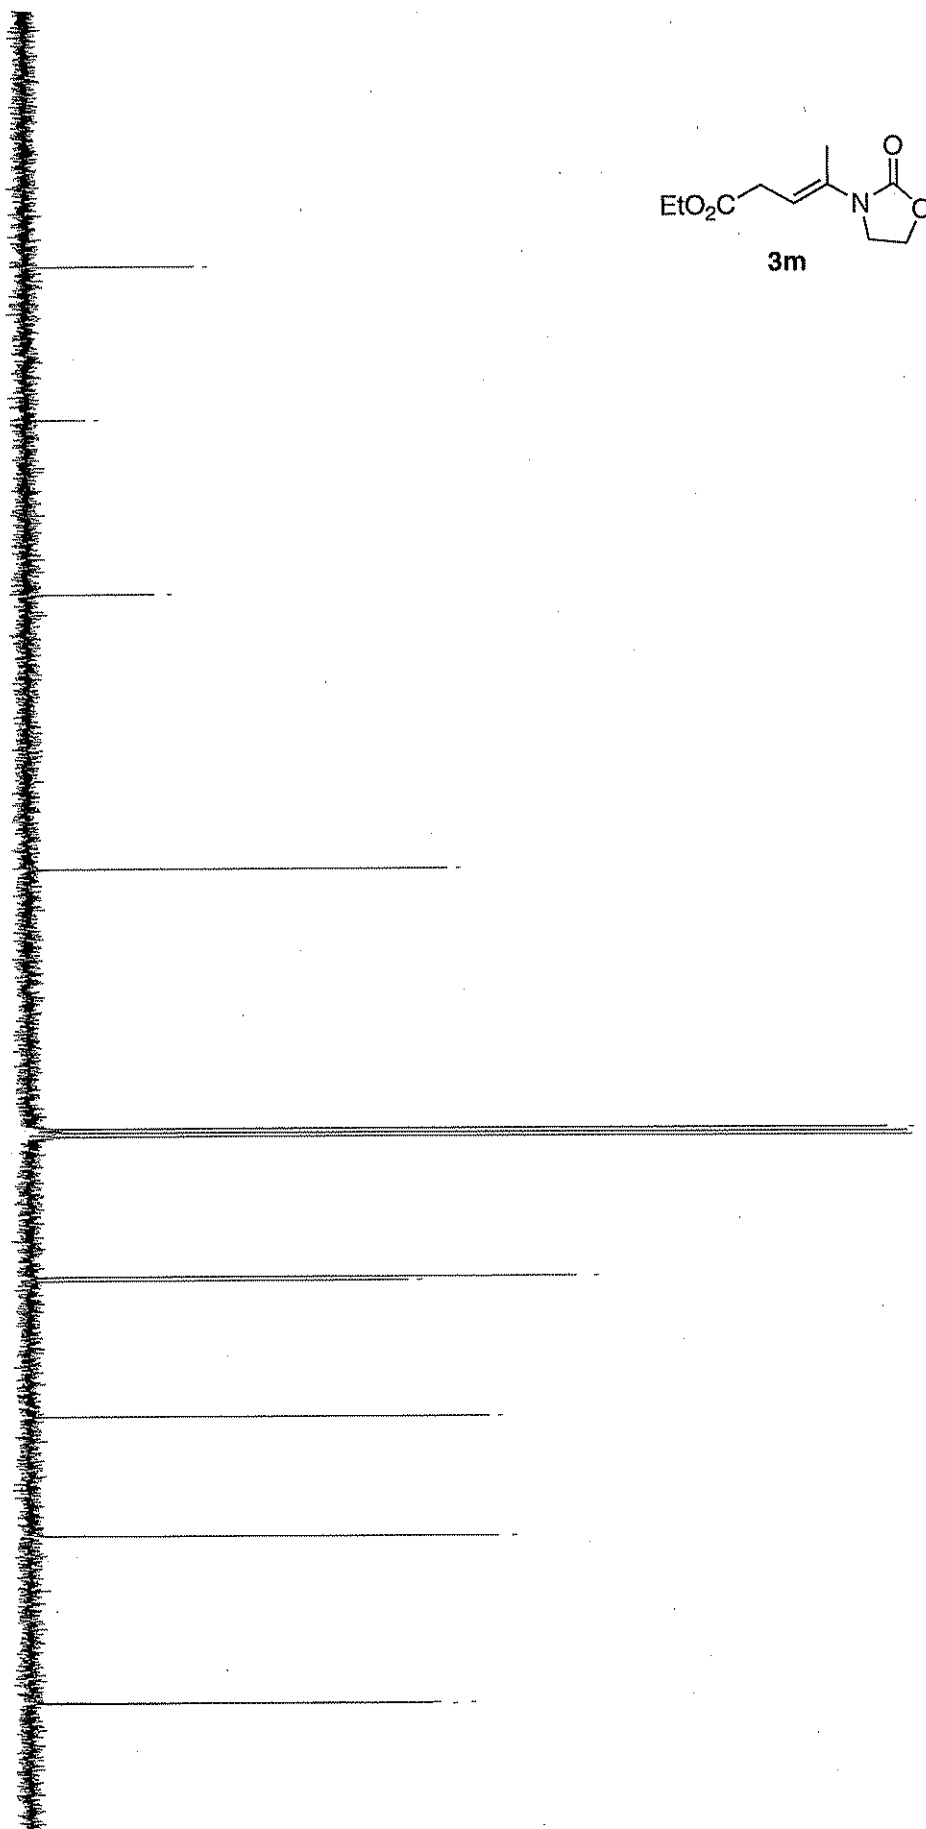

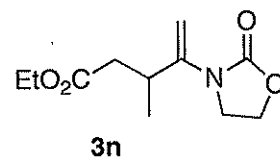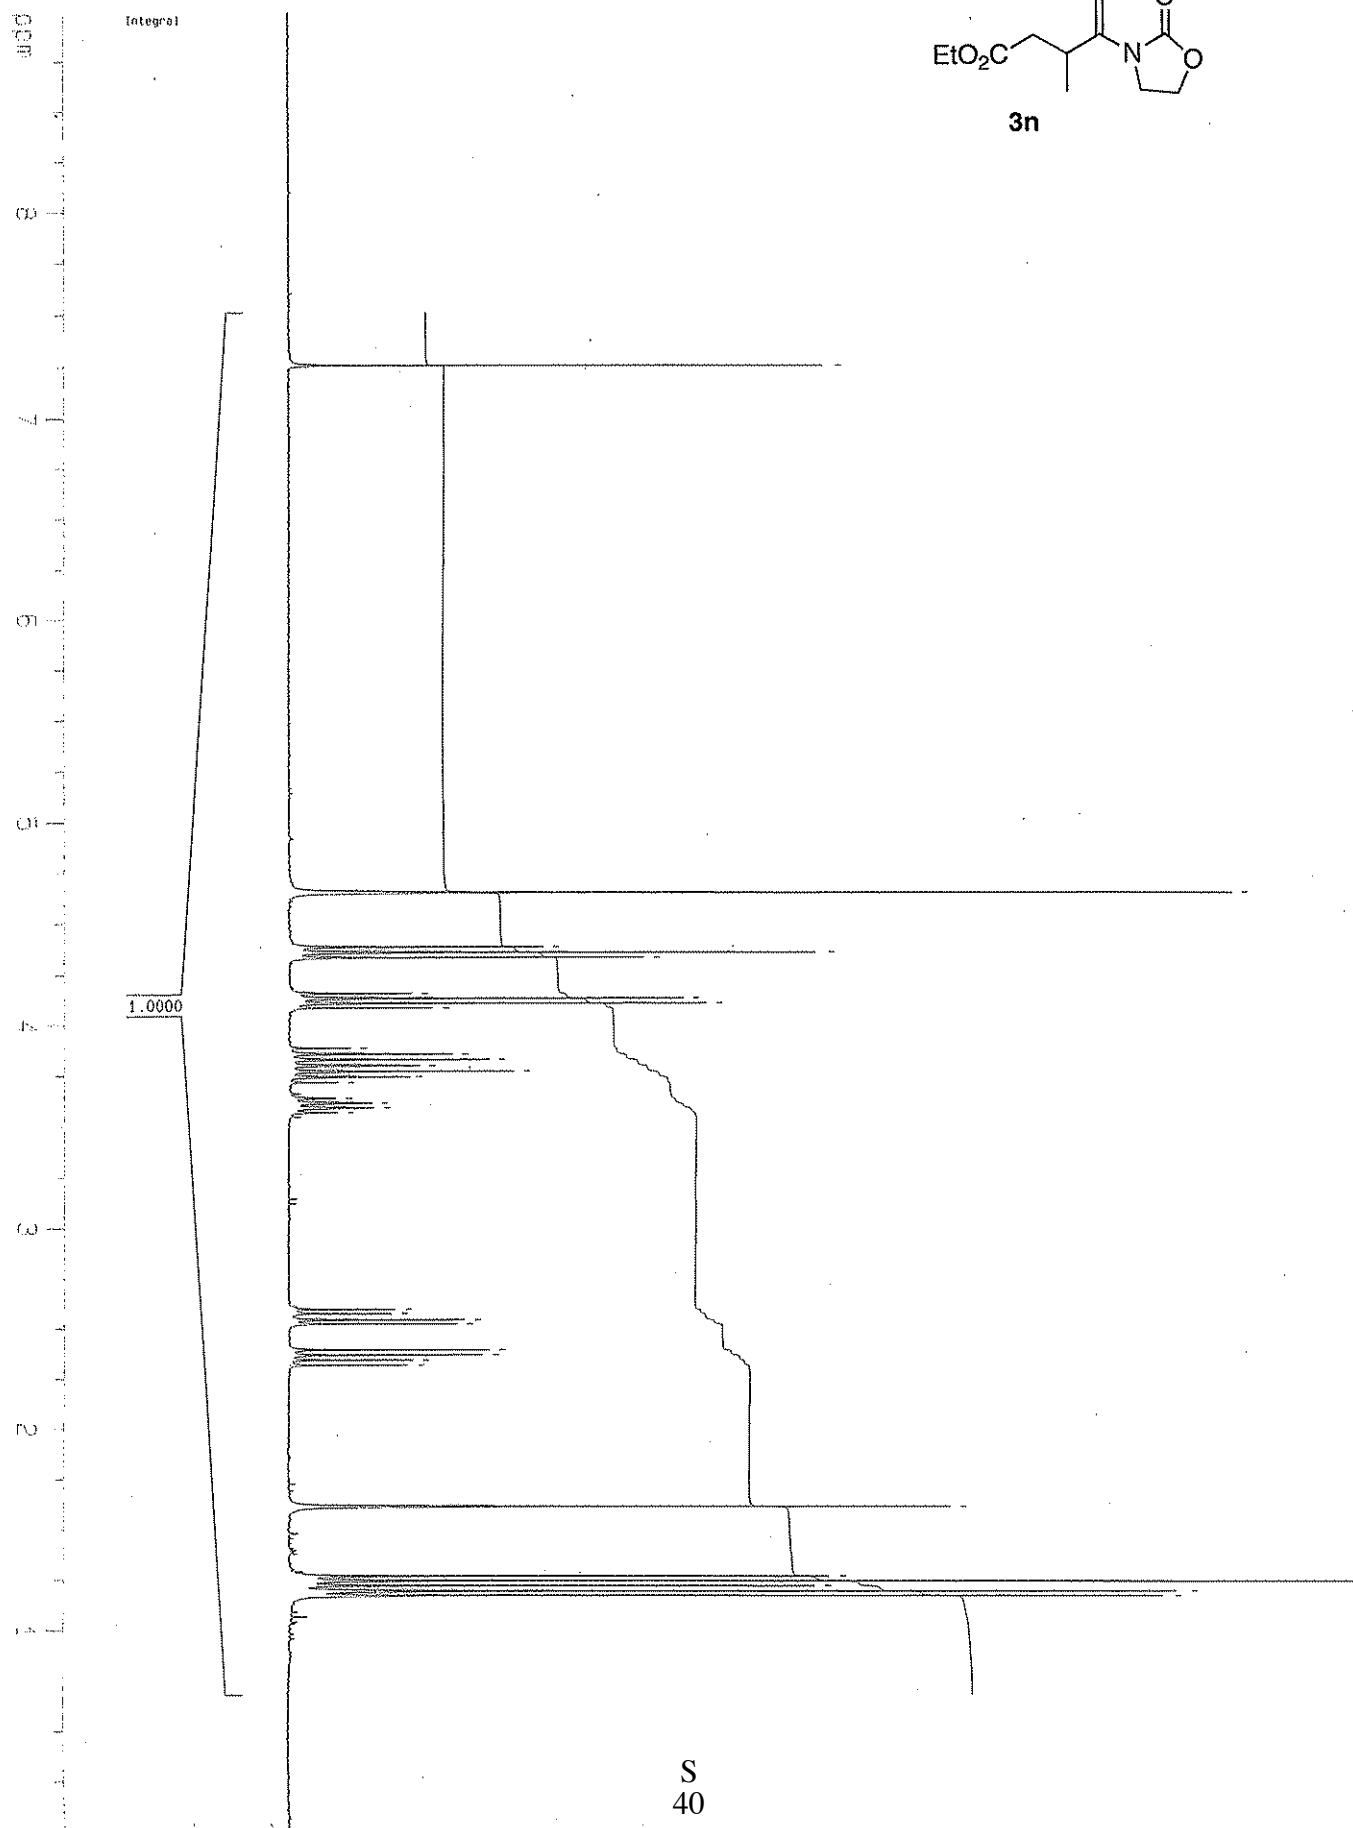



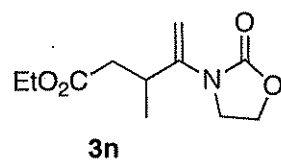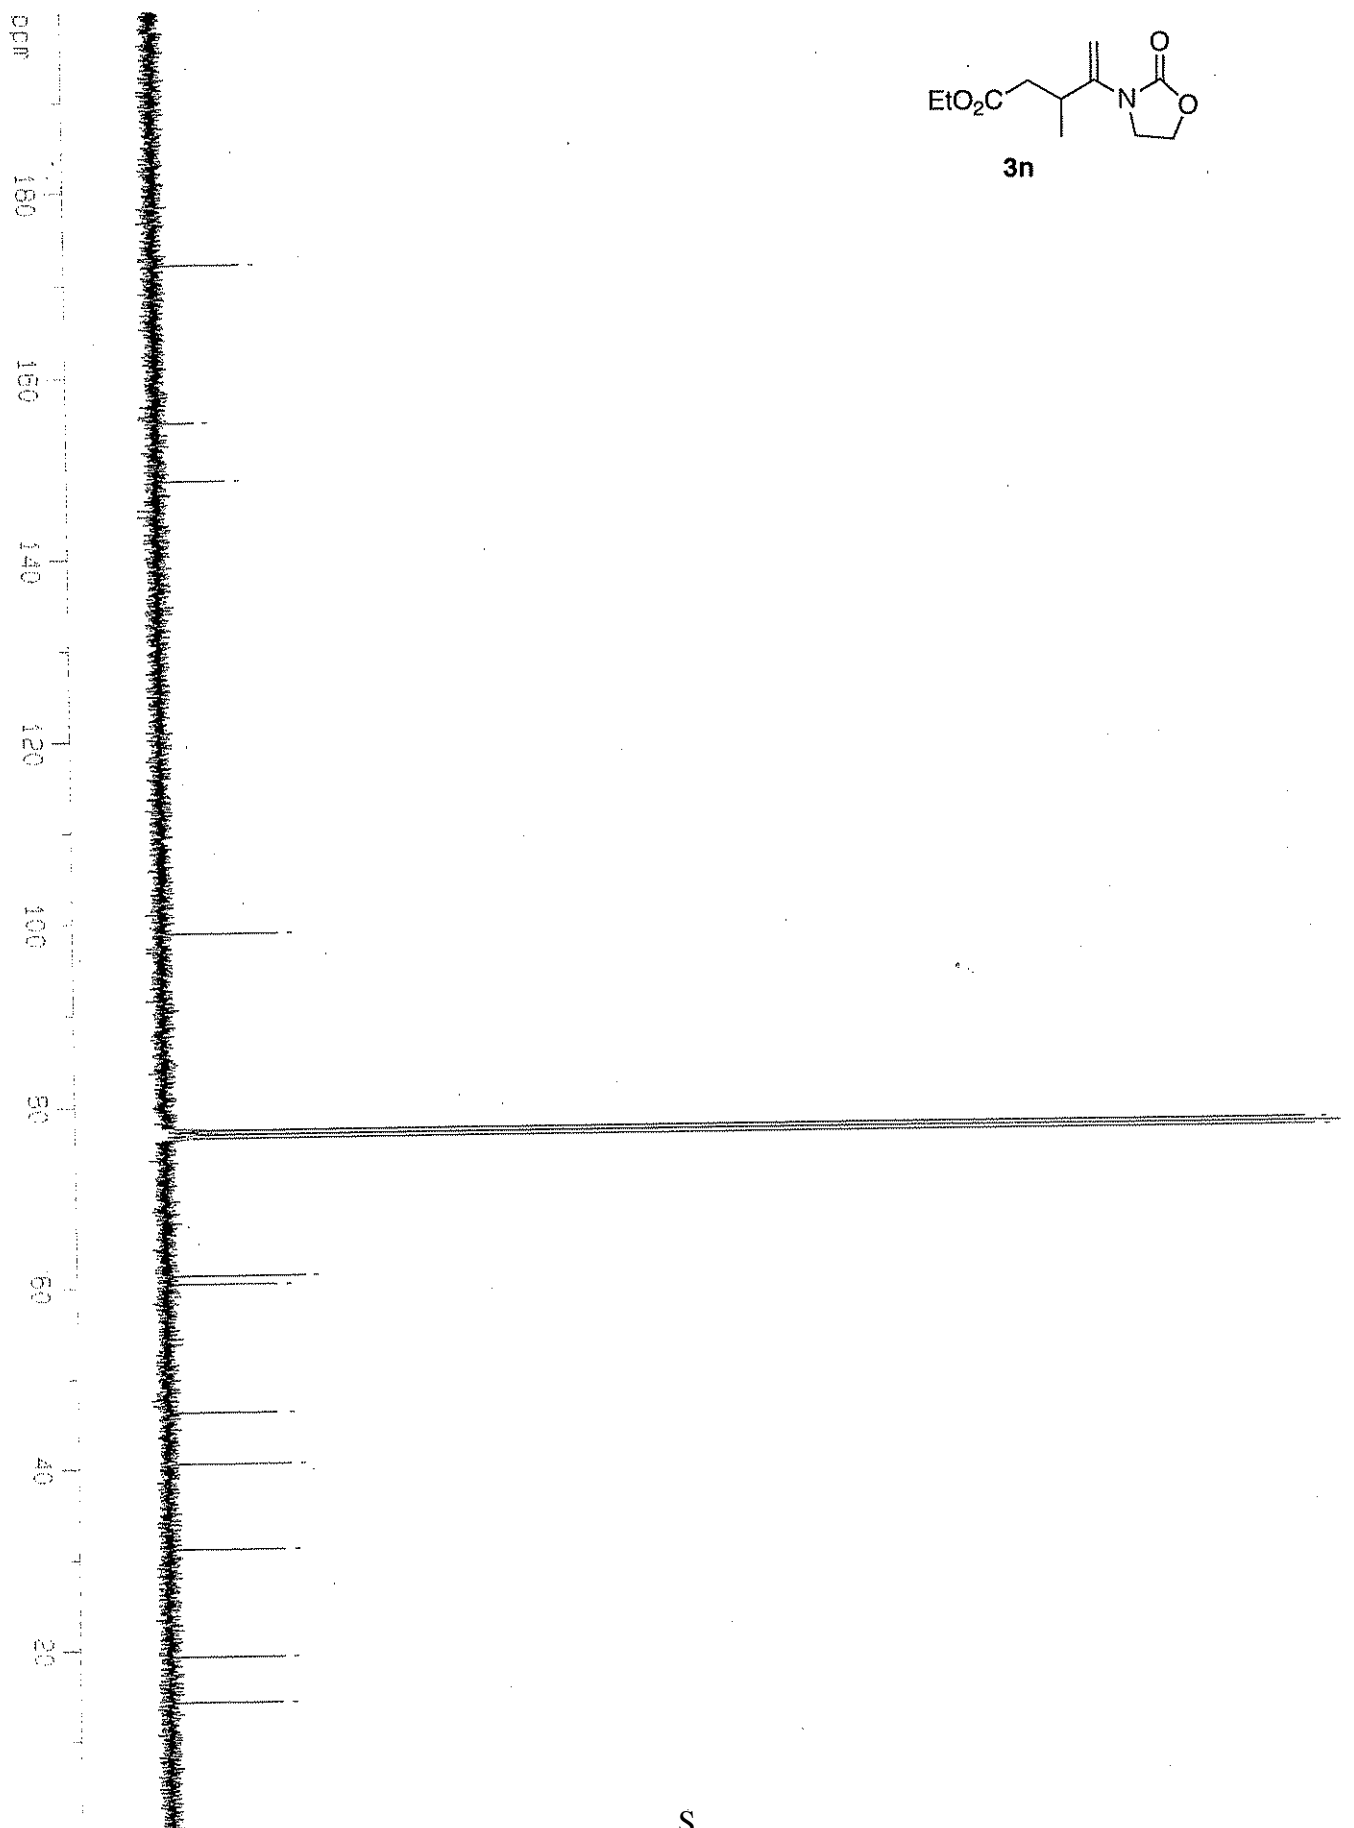

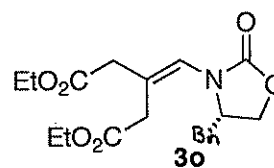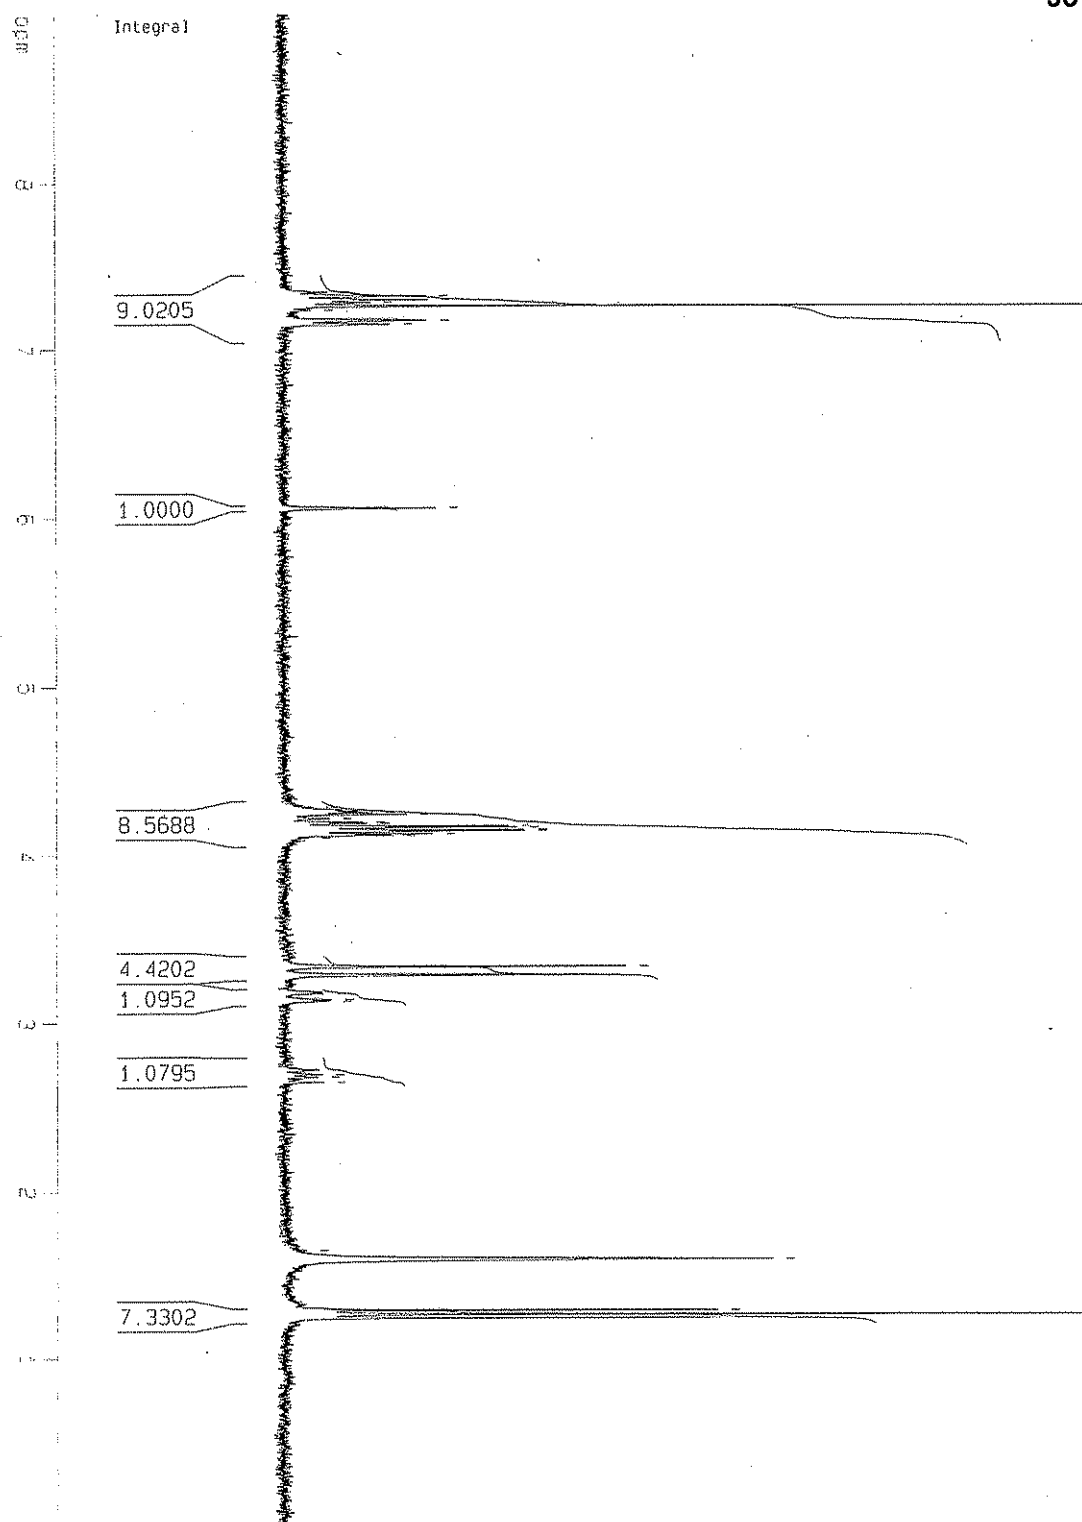

ppm 180 160 140 120 100 80 60 40 20

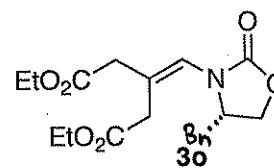

Supplement: Supplementary file 1 [file 4575172]
